# Supplementary material for: Excess death estimates from multiverse analysis in 2009–2021
Source: Springer Nature journal article supplement (doi:10.1007/s10654-023-00998-2), 2023-04-12
Supplement: MOESM1 [file 25233722]

# 13 SUPPLEMENTARY TABLES & FIGURES

## **Excess death estimates from multiverse analysis in 2009-2021**

Michael Levitt<sup>1</sup>, Francesco Zonta<sup>2</sup>, John P.A. Ioannidis<sup>3</sup>

<sup>1</sup>Department of Structural Biology, Stanford University, Stanford, CA 94305, USA

<sup>2</sup>Shanghai Institute for Advanced Immunochemical Studies, ShanghaiTech University, Shanghai 201210, China

<sup>3</sup>Departments of Medicine, of Epidemiology and Population Health, of Biomedical Data Science, and of Statistics, and Meta-Research Innovation Center at Stanford (METRICS), Stanford University, Stanford, CA 94305, USA

Correspondence mail: [jioannid@stanford.edu](mailto:jioannid@stanford.edu)

**Figure S1:** Comparing the multiverse relative excess death, p%, calculated with the 66 reference periods with p% for the single reference period (years 2017 to 2019) published before (6). The multiverse p% values are calculated with dw3 weighting and no weighting (dw0). The fitted linear trends show that dw3 p% values are much closer to 2017-19 p% value with high correlation of 0.997 and average shift of -1.1 percentage points. For the dw0 fit, the correlation is still high at 0.971 but the data is more scattered and the values shift downward by 4.6 percentage points. The gray line is diagonal and shows where  $y=x$

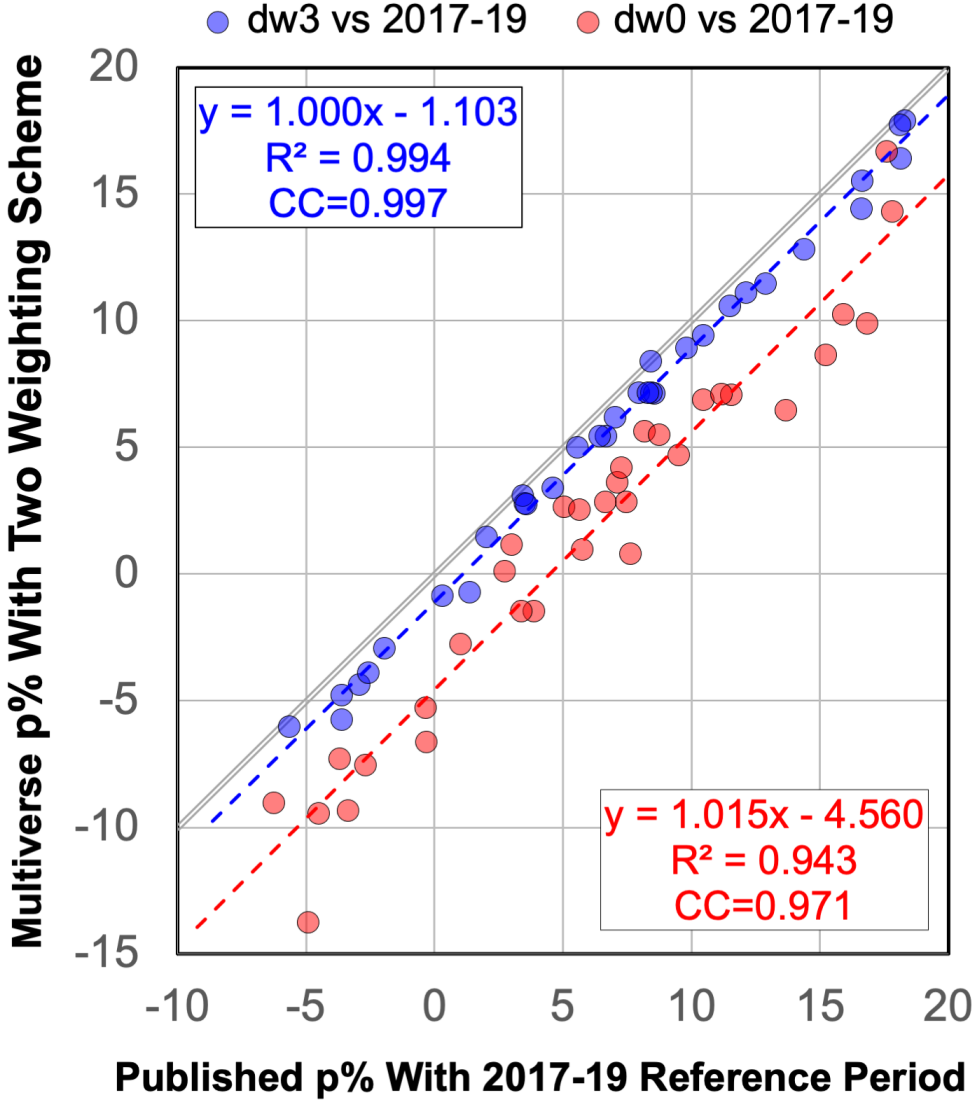

**Figure S2A:** Distribution of the rank of country relative excess death estimates (highest to lowest) in the one-year projected period 2021 for the 33 countries as calculated for each of the 66 different reference baseline year sets. The countries are ordered by decreasing average rank (column 3); the standard deviation of the rank is given in column 4. The country rank is ambiguous for the seven countries between Germany and Netherlands. High- and low-ranking countries are less ambiguous. For 22 countries the diagonal entry occurs most often.

| Country       | Rank  |      | Number of rank occurrences in sort from highest to lowest p% for single year 2021 |    |    |    |    |    |    |    |    |    |    |    |    |    |    |    |    |    |    |    |    |    |    |    |    |    |    |    |    |    |    |    |    |   |   |    |    |
|---------------|-------|------|-----------------------------------------------------------------------------------|----|----|----|----|----|----|----|----|----|----|----|----|----|----|----|----|----|----|----|----|----|----|----|----|----|----|----|----|----|----|----|----|---|---|----|----|
|               | AVE   | SD   | 1                                                                                 | 2  | 3  | 4  | 5  | 6  | 7  | 8  | 9  | 10 | 11 | 12 | 13 | 14 | 15 | 16 | 17 | 18 | 19 | 20 | 21 | 22 | 23 | 24 | 25 | 26 | 27 | 28 | 29 | 30 | 31 | 32 | 33 |   |   |    |    |
| Slovakia      | 1.33  | 0.56 | 47                                                                                | 16 | 3  |    |    |    |    |    |    |    |    |    |    |    |    |    |    |    |    |    |    |    |    |    |    |    |    |    |    |    |    |    |    |   |   |    |    |
| Poland        | 2.42  | 0.55 |                                                                                   | 40 | 24 | 2  |    |    |    |    |    |    |    |    |    |    |    |    |    |    |    |    |    |    |    |    |    |    |    |    |    |    |    |    |    |   |   |    |    |
| United States | 2.98  | 1.67 | 19                                                                                | 8  | 13 | 15 | 4  | 6  | 1  |    |    |    |    |    |    |    |    |    |    |    |    |    |    |    |    |    |    |    |    |    |    |    |    |    |    |   |   |    |    |
| Latvia        | 3.58  | 0.55 |                                                                                   | 2  | 24 | 40 |    |    |    |    |    |    |    |    |    |    |    |    |    |    |    |    |    |    |    |    |    |    |    |    |    |    |    |    |    |   |   |    |    |
| Czechia       | 5.26  | 0.84 |                                                                                   |    | 1  | 6  | 40 | 15 | 2  | 2  |    |    |    |    |    |    |    |    |    |    |    |    |    |    |    |    |    |    |    |    |    |    |    |    |    |   |   |    |    |
| Lithuania     | 5.74  | 0.93 |                                                                                   |    | 1  | 3  | 19 | 36 | 4  | 2  | 1  |    |    |    |    |    |    |    |    |    |    |    |    |    |    |    |    |    |    |    |    |    |    |    |    |   |   |    |    |
| Croatia       | 7.45  | 0.96 |                                                                                   |    |    |    | 3  | 2  | 31 | 24 | 5  | 1  |    |    |    |    |    |    |    |    |    |    |    |    |    |    |    |    |    |    |    |    |    |    |    |   |   |    |    |
| Hungary       | 7.73  | 0.85 |                                                                                   |    |    |    |    | 4  | 21 | 32 | 7  | 2  |    |    |    |    |    |    |    |    |    |    |    |    |    |    |    |    |    |    |    |    |    |    |    |   |   |    |    |
| Chile         | 9.48  | 1.18 |                                                                                   |    |    |    |    | 1  | 7  | 3  | 11 | 36 | 8  |    |    |    |    |    |    |    |    |    |    |    |    |    |    |    |    |    |    |    |    |    |    |   |   |    |    |
| Greece        | 9.48  | 0.89 |                                                                                   |    |    |    |    |    | 1  |    |    | 42 | 11 | 12 |    |    |    |    |    |    |    |    |    |    |    |    |    |    |    |    |    |    |    |    |    |   |   |    |    |
| Estonia       | 10.86 | 1.69 |                                                                                   |    |    |    |    | 1  |    | 3  |    | 17 | 40 | 1  | 1  |    | 1  | 1  | 1  |    |    |    |    |    |    |    |    |    |    |    |    |    |    |    |    |   |   |    |    |
| Germany       | 14.02 | 2.10 |                                                                                   |    |    |    |    |    |    |    |    |    |    | 18 | 19 | 8  | 6  | 5  | 5  | 2  | 1  | 2  |    |    |    |    |    |    |    |    |    |    |    |    |    |   |   |    |    |
| United        | 14.50 | 2.23 |                                                                                   |    |    |    |    |    |    |    |    | 3  | 13 | 13 | 7  | 4  | 9  | 11 | 4  | 2  |    |    |    |    |    |    |    |    |    |    |    |    |    |    |    |   |   |    |    |
| Austria       | 14.74 | 2.72 |                                                                                   |    |    |    |    |    |    |    |    |    |    | 24 | 5  | 6  | 7  | 4  | 4  | 8  | 6  | 1  | 1  |    |    |    |    |    |    |    |    |    |    |    |    |   |   |    |    |
| Italy         | 15.20 | 1.84 |                                                                                   |    |    |    |    |    |    |    | 2  | 3  | 4  | 13 | 17 | 15 | 5  | 4  | 1  | 2  |    |    |    |    |    |    |    |    |    |    |    |    |    |    |    |   |   |    |    |
| Portugal      | 15.23 | 1.76 |                                                                                   |    |    |    |    |    |    |    |    | 3  | 6  | 18 | 11 | 12 | 9  | 6  |    |    | 1  |    |    |    |    |    |    |    |    |    |    |    |    |    |    |   |   |    |    |
| Slovenia      | 16.18 | 2.75 |                                                                                   |    |    |    |    |    |    |    |    | 4  | 17 | 4  | 4  | 3  | 3  | 9  | 18 | 4  |    |    |    |    |    |    |    |    |    |    |    |    |    |    |    |   |   |    |    |
| Netherlands   | 16.35 | 1.58 |                                                                                   |    |    |    |    |    |    |    |    |    | 2  | 8  | 14 | 7  | 12 | 22 | 1  |    |    |    |    |    |    |    |    |    |    |    |    |    |    |    |    |   |   |    |    |
| France        | 17.92 | 1.37 |                                                                                   |    |    |    |    |    |    |    |    |    |    | 1  | 1  | 10 | 15 | 6  | 29 | 4  |    |    |    |    |    |    |    |    |    |    |    |    |    |    |    |   |   |    |    |
| Canada        | 20.15 | 0.97 |                                                                                   |    |    |    |    |    |    |    |    |    |    |    | 1  |    |    |    | 2  | 3  | 41 | 16 | 3  |    |    |    |    |    |    |    |    |    |    |    |    |   |   |    |    |
| Israel        | 20.92 | 1.34 |                                                                                   |    |    |    |    |    |    |    |    |    |    |    |    | 1  |    | 1  | 2  | 3  | 9  | 25 | 24 | 1  |    |    |    |    |    |    |    |    |    |    |    |   |   |    |    |
| Spain         | 21.56 | 0.84 |                                                                                   |    |    |    |    |    |    |    |    |    |    |    |    |    |    |    |    | 2  | 3  | 22 | 35 | 3  | 1  |    |    |    |    |    |    |    |    |    |    |   |   |    |    |
| Finland       | 23.56 | 0.84 |                                                                                   |    |    |    |    |    |    |    |    |    |    |    |    |    |    |    |    |    |    |    | 1  | 37 | 22 | 2  | 4  |    |    |    |    |    |    |    |    |   |   |    |    |
| Luxembourg    | 24.68 | 1.78 |                                                                                   |    |    |    |    |    |    |    |    |    |    |    |    |    |    |    |    |    |    |    | 3  | 16 | 23 | 4  | 3  | 11 | 6  |    |    |    |    |    |    |   |   |    |    |
| Belgium       | 25.26 | 1.19 |                                                                                   |    |    |    |    |    |    |    |    |    |    |    |    |    |    |    |    |    |    |    |    | 5  | 10 | 23 | 23 | 3  |    | 2  |    |    |    |    |    |   |   |    |    |
| Switzerland   | 26.09 | 1.28 |                                                                                   |    |    |    |    |    |    |    |    |    |    |    |    |    |    |    |    |    |    |    |    | 1  | 7  | 13 | 17 | 22 | 5  |    | 1  |    |    |    |    |   |   |    |    |
| Denmark       | 26.95 | 1.94 |                                                                                   |    |    |    |    |    |    |    |    |    |    |    |    |    |    |    |    |    |    |    |    |    | 1  | 19 | 10 | 17 | 5  | 6  | 3  | 3  | 2  |    |    |   |   |    |    |
| Iceland       | 28.39 | 2.58 |                                                                                   |    |    |    |    |    |    |    |    |    |    |    |    |    |    |    |    |    |    |    | 1  | 3  | 1  | 3  | 7  | 7  | 10 | 12 | 3  | 14 | 3  | 2  |    |   |   |    |    |
| New Zealand   | 28.56 | 1.45 |                                                                                   |    |    |    |    |    |    |    |    |    |    |    |    |    |    |    |    |    |    |    |    |    | 1  | 1  | 2  | 5  | 24 | 22 | 6  | 2  | 2  | 1  |    |   |   |    |    |
| Australia     | 29.71 | 0.83 |                                                                                   |    |    |    |    |    |    |    |    |    |    |    |    |    |    |    |    |    |    |    |    |    |    | 1  |    |    |    |    |    |    |    |    |    |   |   |    |    |
| Norway        | 29.94 | 1.27 |                                                                                   |    |    |    |    |    |    |    |    |    |    |    |    |    |    |    |    |    |    |    |    |    |    |    |    |    |    | 1  | 13 | 10 | 7  | 35 |    |   |   |    |    |
| Sweden        | 31.86 | 0.60 |                                                                                   |    |    |    |    |    |    |    |    |    |    |    |    |    |    |    |    |    |    |    |    |    |    |    |    |    |    |    |    |    |    |    | 1  |   | 7 | 56 | 2  |
| South Korea   | 32.88 | 0.48 |                                                                                   |    |    |    |    |    |    |    |    |    |    |    |    |    |    |    |    |    |    |    |    |    |    |    |    |    |    |    |    |    |    |    |    | 1 | 1 | 3  | 61 |

**Figure S2B:** Distribution of the rank of country excess death estimates (from highest to lowest) in the three-year projected period 2019+2020+2021 expressed as a percentage of the expected deaths for the 33 countries as calculated for each of the 66 different reference baseline year sets. The countries are ordered by decreasing average rank (column 3); the standard deviation of the rank is given in column 4. High- and low-ranking countries have consistent ranks but those lying in between are more ambiguous. 18 on diagonal

| Country        | Rank  |      | Number of rank occurrences in sort from highest to lowest p% for 3-year projected period 2019+2020+2021 |    |    |    |    |    |    |    |    |    |    |    |    |    |    |    |    |    |    |    |    |    |    |    |    |    |    |    |    |    |    |    |    |  |  |
|----------------|-------|------|---------------------------------------------------------------------------------------------------------|----|----|----|----|----|----|----|----|----|----|----|----|----|----|----|----|----|----|----|----|----|----|----|----|----|----|----|----|----|----|----|----|--|--|
|                | AVE   | SD   | 1                                                                                                       | 2  | 3  | 4  | 5  | 6  | 7  | 8  | 9  | 10 | 11 | 12 | 13 | 14 | 15 | 16 | 17 | 18 | 19 | 20 | 21 | 22 | 23 | 24 | 25 | 26 | 27 | 28 | 29 | 30 | 31 | 32 | 33 |  |  |
| United States  | 1.27  | 0.54 | 50                                                                                                      | 15 |    | 1  |    |    |    |    |    |    |    |    |    |    |    |    |    |    |    |    |    |    |    |    |    |    |    |    |    |    |    |    |    |  |  |
| Poland         | 1.77  | 0.42 | 15                                                                                                      | 51 |    |    |    |    |    |    |    |    |    |    |    |    |    |    |    |    |    |    |    |    |    |    |    |    |    |    |    |    |    |    |    |  |  |
| Czechia        | 3.41  | 1.06 |                                                                                                         |    | 52 | 8  | 4  |    |    | 1  | 1  |    |    |    |    |    |    |    |    |    |    |    |    |    |    |    |    |    |    |    |    |    |    |    |    |  |  |
| Slovakia       | 6.00  | 3.39 | 1                                                                                                       | 2  | 35 | 5  | 6  | 2  | 1  | 4  |    | 3  | 3  |    | 1  | 2  |    | 1  |    |    |    |    |    |    |    |    |    |    |    |    |    |    |    |    |    |  |  |
| Greece         | 6.20  | 2.74 |                                                                                                         | 3  | 12 | 22 | 9  | 7  | 4  | 2  | 1  | 2  | 1  | 1  | 1  |    |    |    |    | 1  |    |    |    |    |    |    |    |    |    |    |    |    |    |    |    |  |  |
| Hungary        | 7.08  | 1.44 |                                                                                                         |    |    | 13 | 8  | 20 | 15 | 7  | 2  | 1  |    |    |    |    |    |    |    |    |    |    |    |    |    |    |    |    |    |    |    |    |    |    |    |  |  |
| Lithuania      | 7.21  | 2.14 |                                                                                                         | 2  | 4  | 7  | 15 | 8  | 15 | 6  | 4  | 2  | 2  | 1  |    |    |    |    |    |    |    |    |    |    |    |    |    |    |    |    |    |    |    |    |    |  |  |
| Latvia         | 7.85  | 2.43 |                                                                                                         | 2  |    | 4  | 15 | 13 | 11 | 6  | 8  | 3  | 2  |    | 1  |    |    |    |    | 1  |    |    |    |    |    |    |    |    |    |    |    |    |    |    |    |  |  |
| Croatia        | 8.68  | 2.27 |                                                                                                         | 1  | 4  | 1  | 2  | 7  | 11 | 21 | 11 | 3  | 1  | 2  | 1  |    | 1  |    |    |    |    |    |    |    |    |    |    |    |    |    |    |    |    |    |    |  |  |
| Italy          | 9.85  | 2.68 |                                                                                                         | 2  | 1  | 1  | 3  | 6  | 3  | 7  | 16 | 11 | 10 | 3  | 1  |    | 1  |    | 1  |    |    |    |    |    |    |    |    |    |    |    |    |    |    |    |    |  |  |
| Chile          | 10.95 | 4.11 |                                                                                                         | 2  |    | 7  | 5  | 1  | 2  | 4  | 7  | 10 | 7  | 4  | 4  | 2  | 4  | 2  | 3  | 1  | 1  |    |    |    |    |    |    |    |    |    |    |    |    |    |    |  |  |
| United Kingdom | 12.29 | 3.19 |                                                                                                         |    | 1  | 2  | 2  | 1  | 3  | 3  | 2  | 11 | 6  | 11 | 3  | 11 | 8  | 1  |    | 1  |    |    |    |    |    |    |    |    |    |    |    |    |    |    |    |  |  |
| Slovenia       | 13.44 | 2.89 |                                                                                                         |    |    |    |    |    |    | 2  | 5  | 12 | 15 | 8  | 5  | 2  | 1  | 6  | 5  | 5  |    |    |    |    |    |    |    |    |    |    |    |    |    |    |    |  |  |
| France         | 13.88 | 2.68 |                                                                                                         |    |    |    | 1  |    | 1  | 4  | 3  | 12 | 10 | 15 | 4  | 3  | 6  | 3  | 1  | 3  |    |    |    |    |    |    |    |    |    |    |    |    |    |    |    |  |  |
| Portugal       | 15.65 | 2.31 |                                                                                                         |    |    |    |    |    | 2  | 1  |    |    | 6  | 7  | 19 | 7  | 10 | 8  | 3  | 2  | 1  |    |    |    |    |    |    |    |    |    |    |    |    |    |    |  |  |
| Spain          | 15.88 | 3.09 |                                                                                                         |    |    |    | 1  |    |    |    | 3  | 1  | 3  | 8  | 2  | 8  | 10 | 13 | 4  | 7  | 3  |    | 2  | 1  |    |    |    |    |    |    |    |    |    |    |    |  |  |
| Netherlands    | 16.55 | 2.40 |                                                                                                         |    |    |    |    |    |    |    | 2  | 1  | 1  | 9  | 11 | 10 | 6  | 14 | 6  | 3  | 2  |    |    | 1  |    |    |    |    |    |    |    |    |    |    |    |  |  |
| Austria        | 16.70 | 2.72 |                                                                                                         |    |    |    |    |    |    |    | 2  | 2  | 10 | 3  | 4  | 7  | 7  | 7  | 15 | 7  | 2  |    |    |    |    |    |    |    |    |    |    |    |    |    |    |  |  |
| Germany        | 18.15 | 2.46 |                                                                                                         |    |    |    |    |    |    | 1  |    |    |    |    | 3  | 2  | 9  | 11 | 11 | 15 | 5  | 3  | 1  | 3  | 2  |    |    |    |    |    |    |    |    |    |    |  |  |
| Estonia        | 20.64 | 4.13 |                                                                                                         |    |    |    |    |    |    | 1  |    |    | 1  | 9  | 1  | 2  | 1  | 2  | 3  | 6  | 6  | 8  | 8  | 10 | 4  | 1  | 1  | 1  | 1  |    |    |    |    |    |    |  |  |
| Canada         | 20.68 | 2.13 |                                                                                                         |    |    |    |    |    |    |    |    | 1  |    |    |    | 2  | 1  | 2  | 5  | 26 | 4  | 13 | 5  | 7  |    |    |    |    |    |    |    |    |    |    |    |  |  |
| Belgium        | 20.88 | 1.16 |                                                                                                         |    |    |    |    |    |    |    |    |    |    |    |    | 1  |    | 2  | 3  | 8  | 39 | 10 | 2  | 1  |    |    |    |    |    |    |    |    |    |    |    |  |  |
| Israel         | 22.52 | 1.62 |                                                                                                         |    |    |    |    |    |    |    |    |    |    |    | 1  |    |    |    | 1  |    | 1  | 5  | 23 | 22 | 9  | 3  | 1  |    |    |    |    |    |    |    |    |  |  |
| Switzerland    | 23.71 | 1.23 |                                                                                                         |    |    |    |    |    |    |    |    |    |    |    |    |    |    |    |    |    | 1  | 2  | 6  | 18 | 21 | 16 | 1  | 1  |    |    |    |    |    |    |    |  |  |
| Luxembourg     | 24.47 | 1.70 |                                                                                                         |    |    |    |    |    |    |    |    |    |    |    |    |    |    |    |    |    | 1  | 1  |    | 2  | 2  | 7  | 9  | 31 | 10 | 3  |    |    |    |    |    |  |  |
| Finland        | 26.38 | 0.62 |                                                                                                         |    |    |    |    |    |    |    |    |    |    |    |    |    |    |    |    |    |    |    |    |    |    | 2  | 40 | 21 | 3  |    |    |    |    |    |    |  |  |
| Iceland        | 27.64 | 2.79 |                                                                                                         |    |    |    |    |    |    |    |    |    |    |    |    |    |    |    |    |    | 1  |    |    | 1  | 4  | 9  | 8  | 12 | 6  | 6  | 9  | 2  | 7  | 1  |    |  |  |
| Denmark        | 28.52 | 1.71 |                                                                                                         |    |    |    |    |    |    |    |    |    |    |    |    |    |    |    |    |    |    |    |    |    |    |    | 1  | 24 | 16 | 9  | 4  | 5  | 7  |    |    |  |  |
| New Zealand    | 28.70 | 1.53 |                                                                                                         |    |    |    |    |    |    |    |    |    |    |    |    |    |    |    |    |    |    |    |    | 1  | 1  | 2  |    | 31 | 18 | 7  | 1  | 3  | 2  |    |    |  |  |
| Sweden         | 29.12 | 1.23 |                                                                                                         |    |    |    |    |    |    |    |    |    |    |    |    |    |    |    |    |    |    |    |    | 1  |    | 1  | 4  | 8  | 25 | 22 | 5  |    |    |    |    |  |  |
| Australia      | 30.80 | 1.00 |                                                                                                         |    |    |    |    |    |    |    |    |    |    |    |    |    |    |    |    |    |    |    |    |    |    |    | 1  | 1  | 2  | 13 | 38 | 10 | 1  |    |    |  |  |
| Norway         | 31.27 | 0.95 |                                                                                                         |    |    |    |    |    |    |    |    |    |    |    |    |    |    |    |    |    |    |    |    |    |    |    |    |    |    | 4  | 11 | 14 | 37 |    |    |  |  |
| South Korea    | 32.88 | 0.56 |                                                                                                         |    |    |    |    |    |    |    |    |    |    |    |    |    |    |    |    |    |    |    |    |    |    |    |    |    |    | 1  | 1  | 2  | 62 |    |    |  |  |

**Figure S2C:** Distribution of the rank of country excess death estimates (from highest to lowest) in the four-year projected period 2018+2019+2020+2021 expressed as a percentage of the expected deaths for the 33 countries as calculated for each of the 66 different reference baseline year sets. The countries are ordered by decreasing average rank (column 3); the standard deviation of the rank is given in column 4. High- and low-ranking countries have consistent ranks but those lying in between are more ambiguous. The most common rank occurrence is on the diagonal 17 times.

| Country        | Rank  |      | Rank in Sort from Highest p% to Lowest p% For Four Years 2018, 2019, 2020 & 2021 |    |    |    |    |    |    |    |    |    |    |    |    |    |    |    |    |    |    |    |    |    |    |    |    |    |    |    |    |    |    |    |    |    |   |  |
|----------------|-------|------|----------------------------------------------------------------------------------|----|----|----|----|----|----|----|----|----|----|----|----|----|----|----|----|----|----|----|----|----|----|----|----|----|----|----|----|----|----|----|----|----|---|--|
|                | AVE   | SD   | 1                                                                                | 2  | 3  | 4  | 5  | 6  | 7  | 8  | 9  | 10 | 11 | 12 | 13 | 14 | 15 | 16 | 17 | 18 | 19 | 20 | 21 | 22 | 23 | 24 | 25 | 26 | 27 | 28 | 29 | 30 | 31 | 32 | 33 |    |   |  |
| United States  | 1.30  | 0.63 | 49                                                                               | 16 |    |    | 1  |    |    |    |    |    |    |    |    |    |    |    |    |    |    |    |    |    |    |    |    |    |    |    |    |    |    |    |    |    |   |  |
| Poland         | 1.77  | 0.45 | 16                                                                               | 49 | 1  |    |    |    |    |    |    |    |    |    |    |    |    |    |    |    |    |    |    |    |    |    |    |    |    |    |    |    |    |    |    |    |   |  |
| Czechia        | 3.91  | 1.74 |                                                                                  |    | 44 | 7  | 7  | 1  | 5  |    |    | 1  |    | 1  |    |    |    |    |    |    |    |    |    |    |    |    |    |    |    |    |    |    |    |    |    |    |   |  |
| Hungary        | 6.27  | 1.74 |                                                                                  |    |    | 11 | 13 | 17 | 11 | 4  | 7  | 2  | 1  |    |    |    |    |    |    |    |    |    |    |    |    |    |    |    |    |    |    |    |    |    |    |    |   |  |
| Latvia         | 6.89  | 2.84 |                                                                                  |    | 1  | 9  | 19 | 9  | 7  | 4  | 6  | 4  | 1  | 2  | 2  | 1  |    |    |    | 1  |    |    |    |    |    |    |    |    |    |    |    |    |    |    |    |    |   |  |
| Greece         | 7.50  | 3.39 |                                                                                  |    | 3  | 3  | 11 | 15 | 12 | 7  | 3  | 2  | 1  | 3  | 2  |    | 1  | 1  | 1  |    |    |    |    | 1  |    |    |    |    |    |    |    |    |    |    |    |    |   |  |
| Slovakia       | 7.53  | 4.84 | 1                                                                                | 1  | 1  | 27 | 5  | 3  | 6  | 1  | 3  | 2  | 3  | 1  |    | 1  | 3  | 4  |    | 2  | 1  | 1  |    |    |    |    |    |    |    |    |    |    |    |    |    |    |   |  |
| Croatia        | 9.05  | 3.04 |                                                                                  |    | 2  | 4  |    | 1  | 5  | 23 | 11 | 6  | 4  | 1  | 1  | 3  | 4  |    |    |    |    | 1  |    |    |    |    |    |    |    |    |    |    |    |    |    |    |   |  |
| Lithuania      | 9.18  | 2.97 |                                                                                  |    | 2  | 1  | 4  | 6  | 6  | 5  | 15 | 7  | 8  | 3  | 3  | 4  |    |    | 2  |    |    |    |    |    |    |    |    |    |    |    |    |    |    |    |    |    |   |  |
| Italy          | 10.21 | 3.31 |                                                                                  |    | 2  | 2  |    | 1  | 7  | 6  | 9  | 13 | 5  | 8  | 5  | 2  | 3  | 1  |    |    |    | 1  | 1  |    |    |    |    |    |    |    |    |    |    |    |    |    |   |  |
| United Kingdom | 11.02 | 4.66 |                                                                                  |    | 8  | 1  | 2  | 4  | 2  | 3  | 2  | 2  | 12 | 2  | 3  | 6  | 4  | 9  | 4  |    | 2  |    |    |    |    |    |    |    |    |    |    |    |    |    |    |    |   |  |
| France         | 13.12 | 3.55 |                                                                                  |    |    |    | 1  | 2  |    | 1  | 4  | 7  | 5  | 16 | 5  | 3  | 5  | 3  | 4  | 4  | 2  | 4  |    |    |    |    |    |    |    |    |    |    |    |    |    |    |   |  |
| Chile          | 14.17 | 5.38 |                                                                                  |    | 2  |    | 3  | 6  |    | 2  | 2  | 2  | 6  | 3  | 2  | 1  | 2  | 2  | 5  | 11 | 7  | 6  | 4  |    |    |    |    |    |    |    |    |    |    |    |    |    |   |  |
| Slovenia       | 14.62 | 3.75 |                                                                                  |    |    |    |    |    | 3  | 1  | 8  | 7  | 6  | 4  | 2  | 2  | 5  | 12 | 5  | 3  | 6  | 2  |    |    |    |    |    |    |    |    |    |    |    |    |    |    |   |  |
| Portugal       | 14.82 | 2.82 |                                                                                  |    |    |    | 1  | 1  | 2  |    |    | 2  | 3  | 9  | 8  | 10 | 13 | 9  | 4  | 3  |    |    | 1  |    |    |    |    |    |    |    |    |    |    |    |    |    |   |  |
| Germany        | 14.83 | 3.87 |                                                                                  |    |    |    |    | 2  | 2  |    | 4  | 3  | 2  | 13 | 12 | 5  | 3  | 4  | 4  | 4  | 2  | 2  | 1  |    | 3  |    |    |    |    |    |    |    |    |    |    |    |   |  |
| Spain          | 15.48 | 3.79 |                                                                                  |    | 1  |    |    | 2  | 1  |    | 3  | 2  | 4  | 4  | 5  | 7  | 10 | 7  | 9  | 2  | 4  | 2  | 1  | 2  |    |    |    |    |    |    |    |    |    |    |    |    |   |  |
| Netherlands    | 15.56 | 3.03 |                                                                                  |    |    |    |    |    | 1  | 1  | 2  | 2  | 4  | 5  | 7  | 13 | 4  | 10 | 7  | 5  |    | 4  |    | 1  |    |    |    |    |    |    |    |    |    |    |    |    |   |  |
| Austria        | 17.08 | 3.09 |                                                                                  |    |    |    |    |    | 2  | 1  | 2  | 2  | 4  | 4  | 2  | 6  | 3  | 6  | 22 | 10 | 2  |    |    |    |    |    |    |    |    |    |    |    |    |    |    |    |   |  |
| Canada         | 19.55 | 2.97 |                                                                                  |    |    |    |    |    |    |    | 1  | 1  | 2  | 1  | 1  | 3  | 4  | 8  | 6  | 16 | 5  | 5  | 9  | 4  |    |    |    |    |    |    |    |    |    |    |    |    |   |  |
| Belgium        | 20.86 | 1.48 |                                                                                  |    |    |    |    |    |    |    |    |    |    |    |    | 1  |    |    | 5  | 3  | 6  | 35 | 10 | 5  |    | 1  |    |    |    |    |    |    |    |    |    |    |   |  |
| Estonia        | 21.11 | 4.86 |                                                                                  |    |    |    |    |    | 1  |    |    | 1  | 3  | 1  | 4  | 3  | 1  |    | 1  | 3  | 4  | 4  | 13 | 5  | 6  | 8  | 2  | 2  | 1  | 1  | 1  | 1  | 1  | 1  | 1  | 1  | 1 |  |
| Israel         | 22.98 | 1.72 |                                                                                  |    |    |    |    |    |    |    |    |    |    |    |    | 1  |    |    |    |    | 1  | 1  |    | 24 | 9  | 24 | 4  | 1  | 1  |    |    |    |    |    |    |    |   |  |
| Luxembourg     | 23.55 | 2.71 |                                                                                  |    |    |    |    |    |    |    |    |    |    | 1  | 1  |    | 1  |    |    |    | 1  | 3  | 2  | 5  | 15 | 6  | 19 | 8  | 4  |    |    |    |    |    |    |    |   |  |
| Switzerland    | 24.00 | 1.34 |                                                                                  |    |    |    |    |    |    |    |    |    |    |    |    |    |    |    |    |    |    | 1  | 1  | 5  | 18 | 13 | 24 | 1  | 3  |    |    |    |    |    |    |    |   |  |
| Finland        | 26.32 | 0.68 |                                                                                  |    |    |    |    |    |    |    |    |    |    |    |    |    |    |    |    |    |    |    |    |    | 1  | 2  | 41 | 19 | 3  |    |    |    |    |    |    |    |   |  |
| Iceland        | 27.59 | 3.54 |                                                                                  |    |    |    |    |    |    |    |    |    | 1  |    |    |    |    |    |    |    |    |    | 1  | 1  | 2  | 7  | 6  | 5  | 8  | 8  | 5  | 6  | 7  | 7  | 2  | 2  | 2 |  |
| Denmark        | 28.09 | 1.68 |                                                                                  |    |    |    |    |    |    |    |    |    |    |    |    |    |    |    |    |    |    |    |    |    |    |    | 2  | 4  | 25 | 13 | 12 | 2  | 3  | 5  |    |    |   |  |
| New Zealand    | 28.67 | 1.63 |                                                                                  |    |    |    |    |    |    |    |    |    |    |    |    |    |    |    |    |    |    |    |    |    |    | 2  |    | 2  | 2  | 29 | 18 | 7  | 1  | 2  | 3  |    |   |  |
| Sweden         | 29.08 | 1.60 |                                                                                  |    |    |    |    |    |    |    |    |    |    |    |    |    |    |    |    |    |    | 1  |    |    |    |    |    | 1  | 2  | 12 | 19 | 28 | 3  |    |    |    |   |  |
| Norway         | 30.98 | 1.04 |                                                                                  |    |    |    |    |    |    |    |    |    |    |    |    |    |    |    |    |    |    |    |    |    |    |    |    |    |    |    |    |    | 7  | 15 | 16 | 28 |   |  |
| Australia      | 31.08 | 1.02 |                                                                                  |    |    |    |    |    |    |    |    |    |    |    |    |    |    |    |    |    |    |    |    |    |    |    |    | 1  |    |    |    | 3  | 7  | 33 | 21 | 1  |   |  |
| South Korea    | 32.83 | 0.62 |                                                                                  |    |    |    |    |    |    |    |    |    |    |    |    |    |    |    |    |    |    |    |    |    |    |    |    |    |    |    |    | 1  |    | 2  | 3  | 60 |   |  |



**Figure S4A:** Variation with year from 2009 to 2021 of the relative excess death, p%, calculated for single years. The salmon shading marks the range of all 66 reference periods, the purple shading marks the range between the first and third quartile and the black line shows the median for the reference periods. A year with a low p% value is often followed by a year with a high value. These fluctuations are averaged out with longer projected periods.

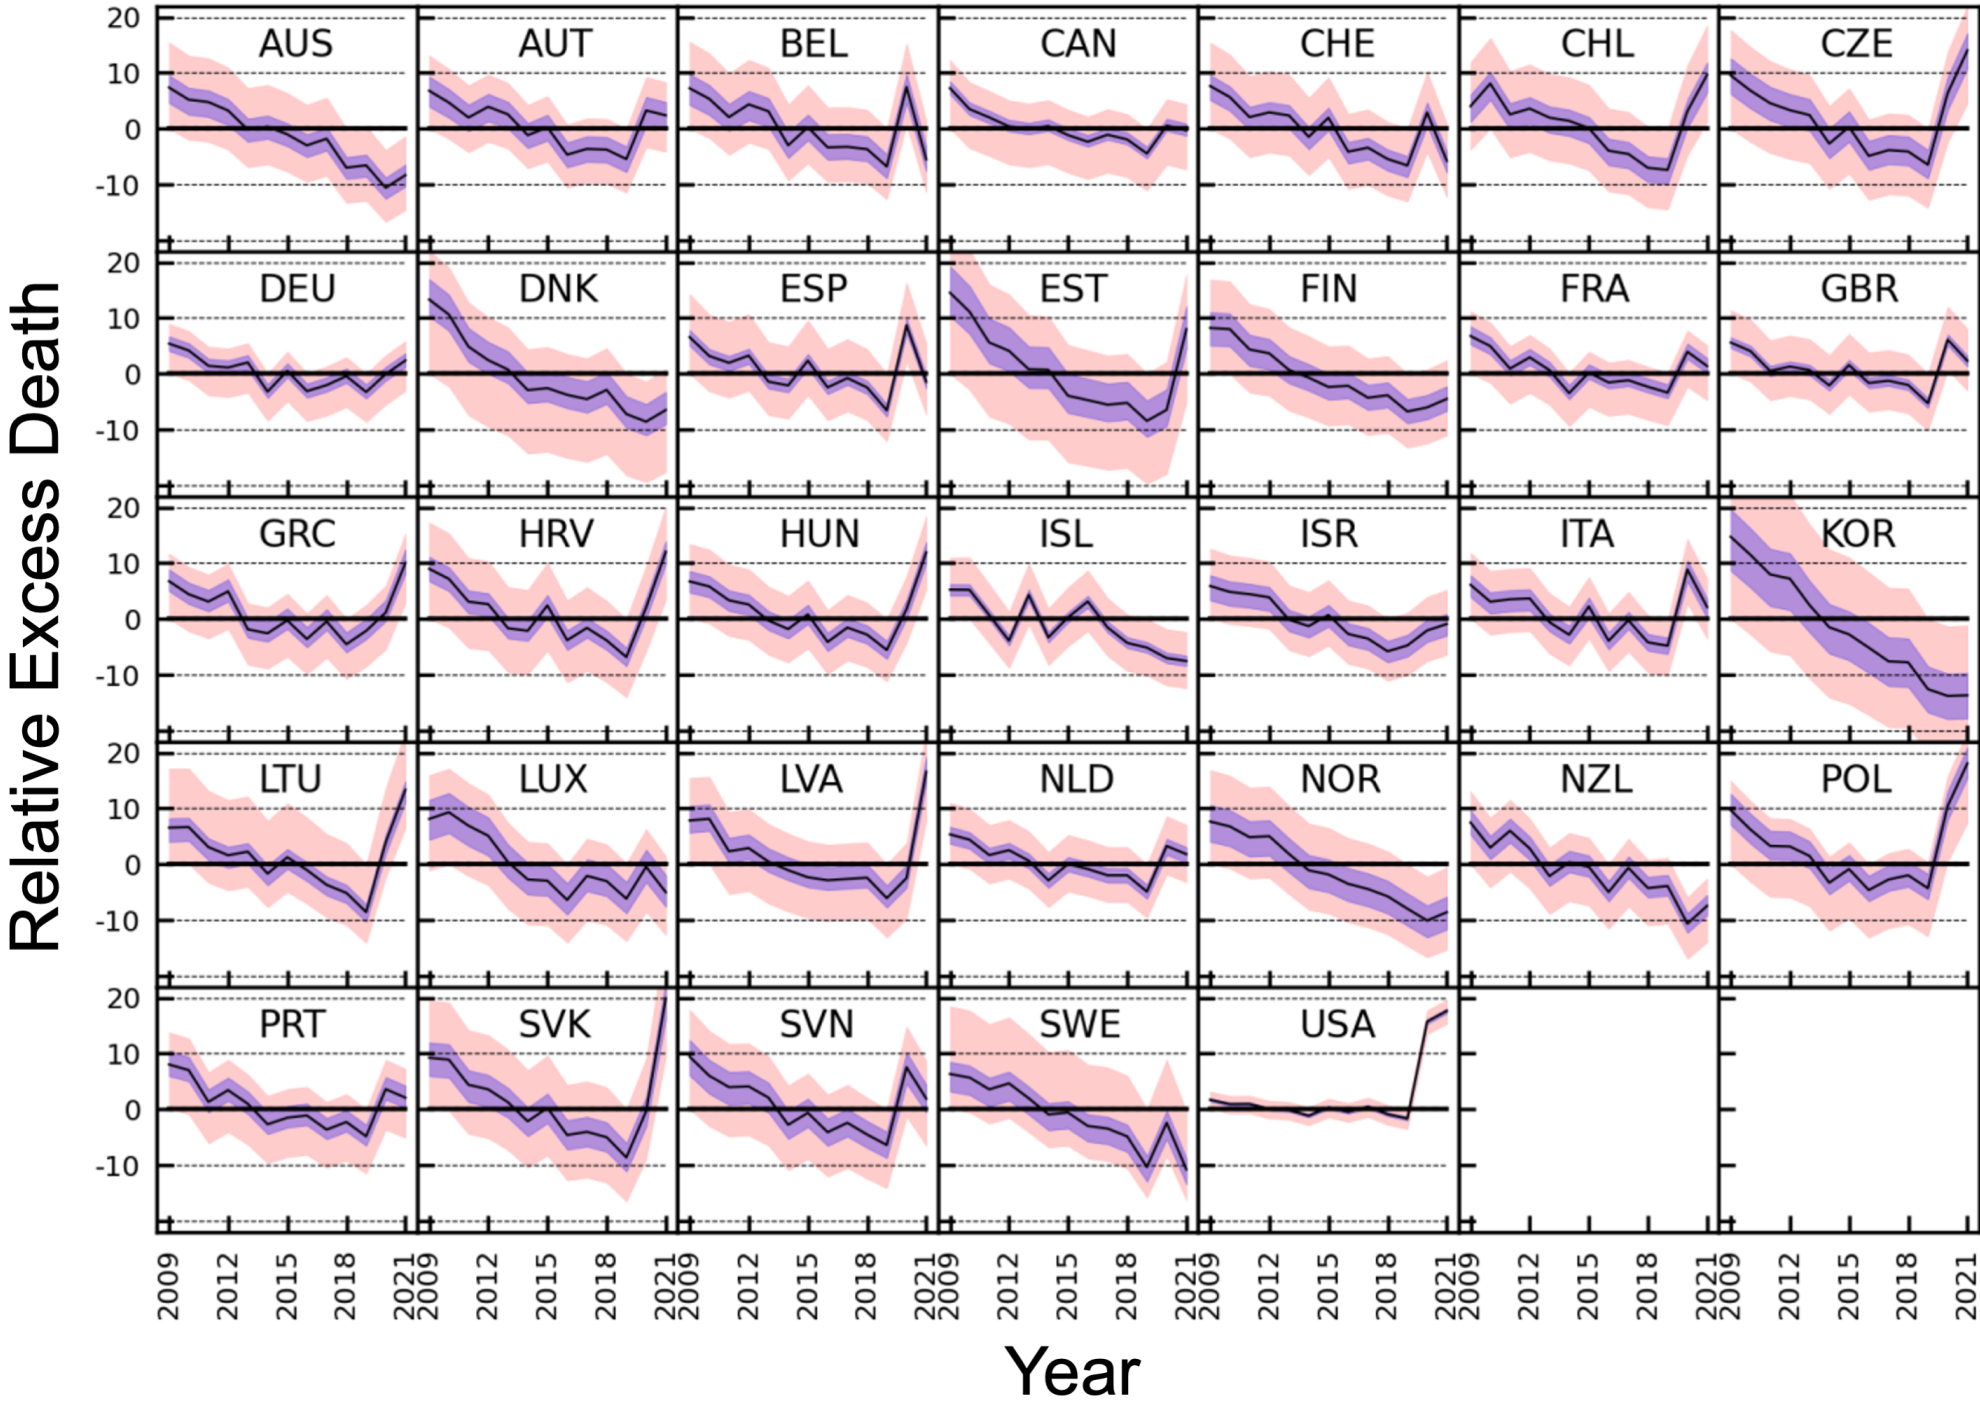

**Figure S4B:** Variation with year from 2009 to 2021 of the Relative Excess Death, p%, averaged over three adjacent years. The salmon shading marks the full range for all 66 reference sets, the purple shading marks the range between the first and third quartile and the black line shows the average over the reference periods. Note that the corresponding figure for averaging over two adjacent years is shown in main text **Figure 2**.

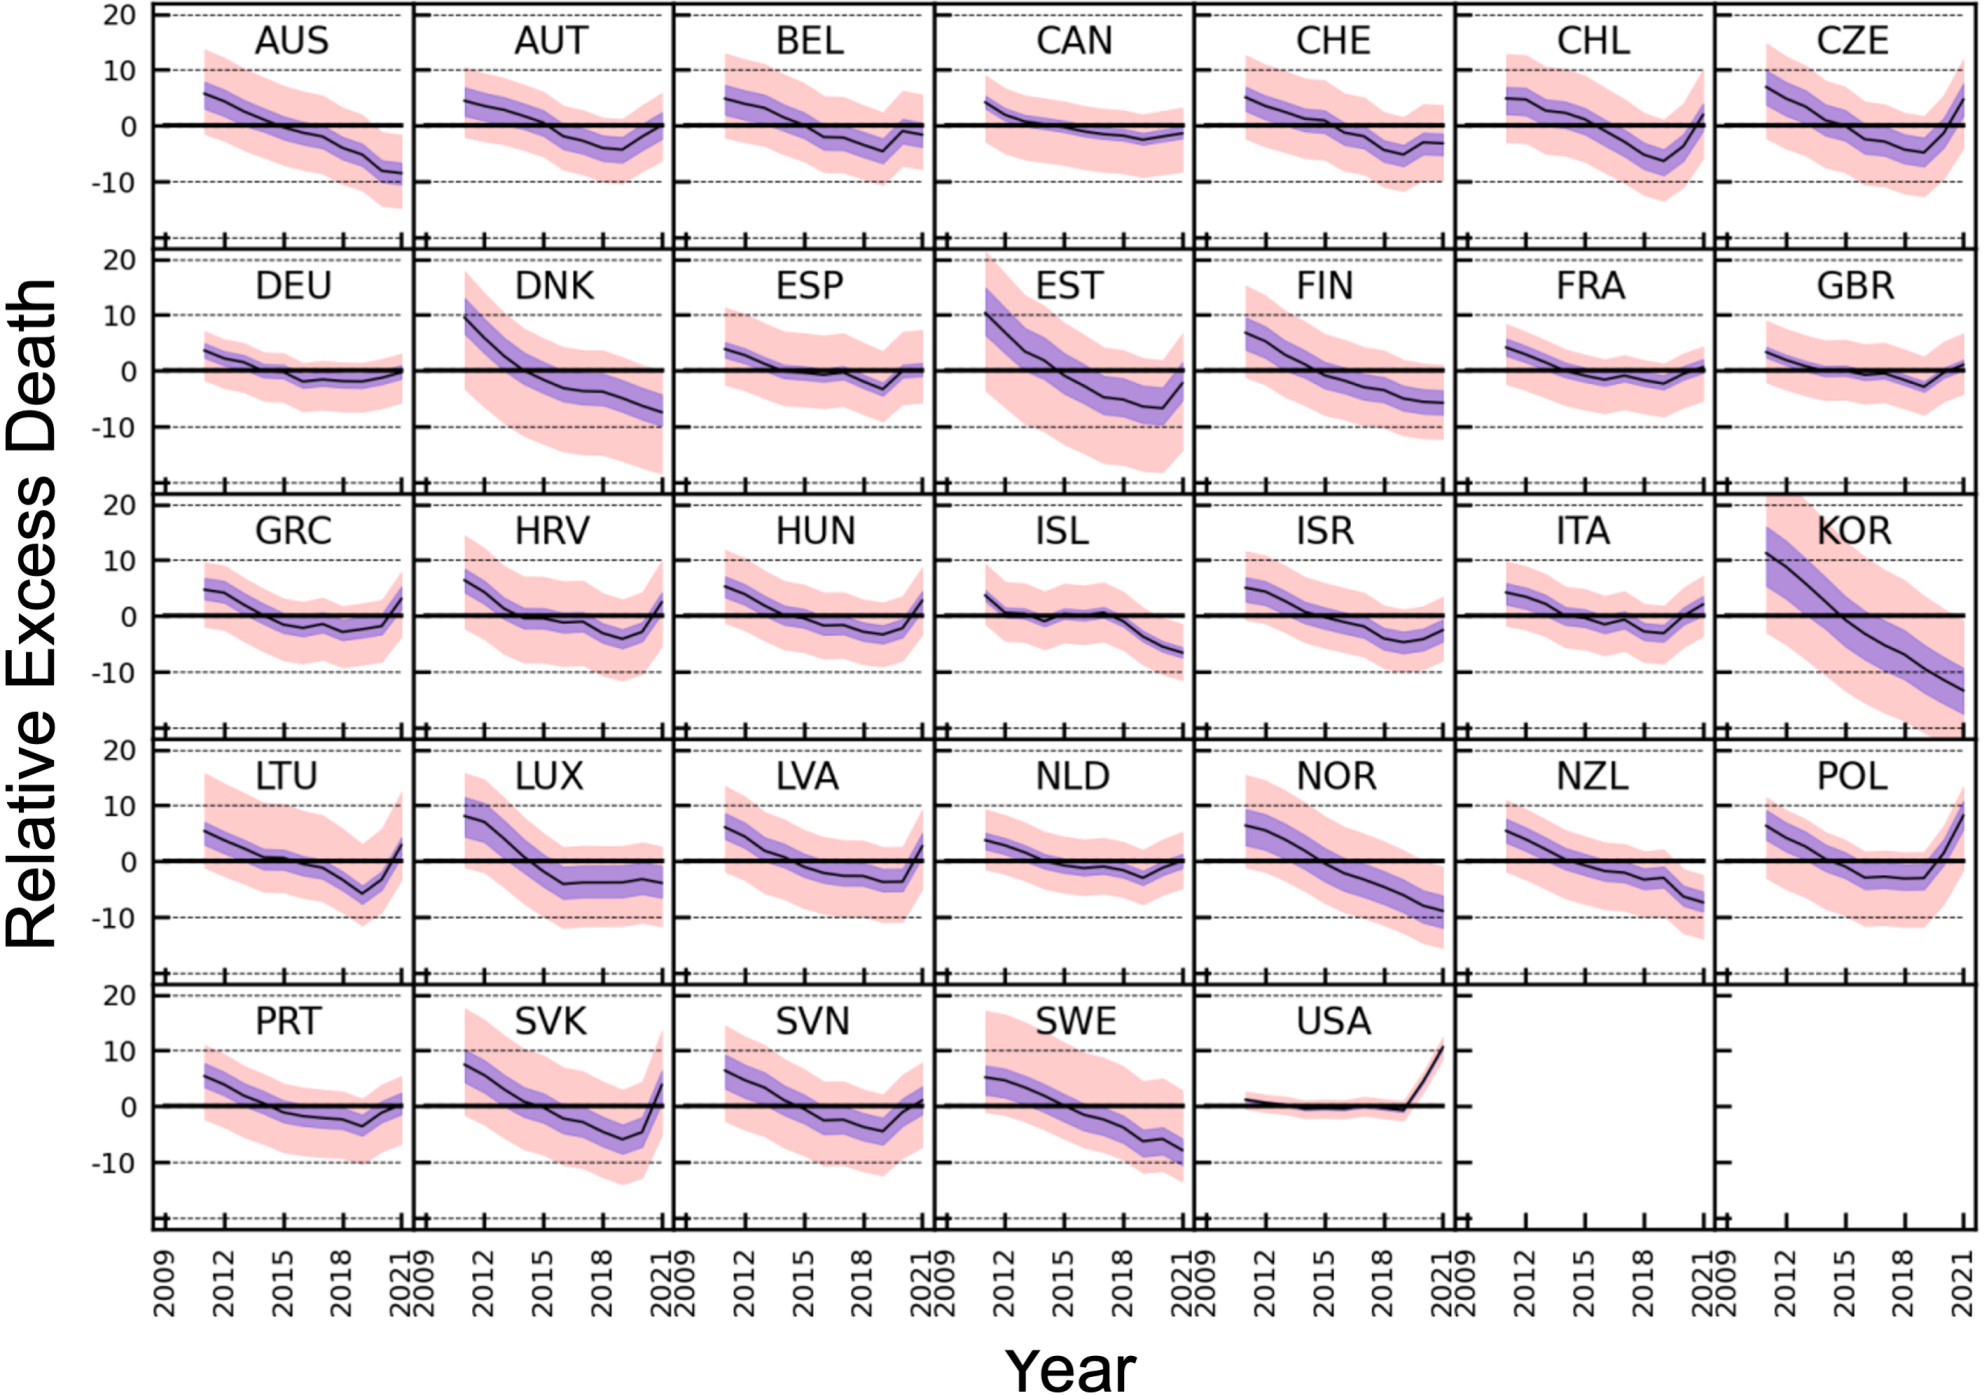



**Figure S4C:** Variation with year from 2009 to 2021 of the relative Excess Death p% averaged over four adjacent years. The salmon shading marks the full range for all 66 reference sets, the purple shading marks the range between the first and third quartile and the black line shows the average over the reference periods.

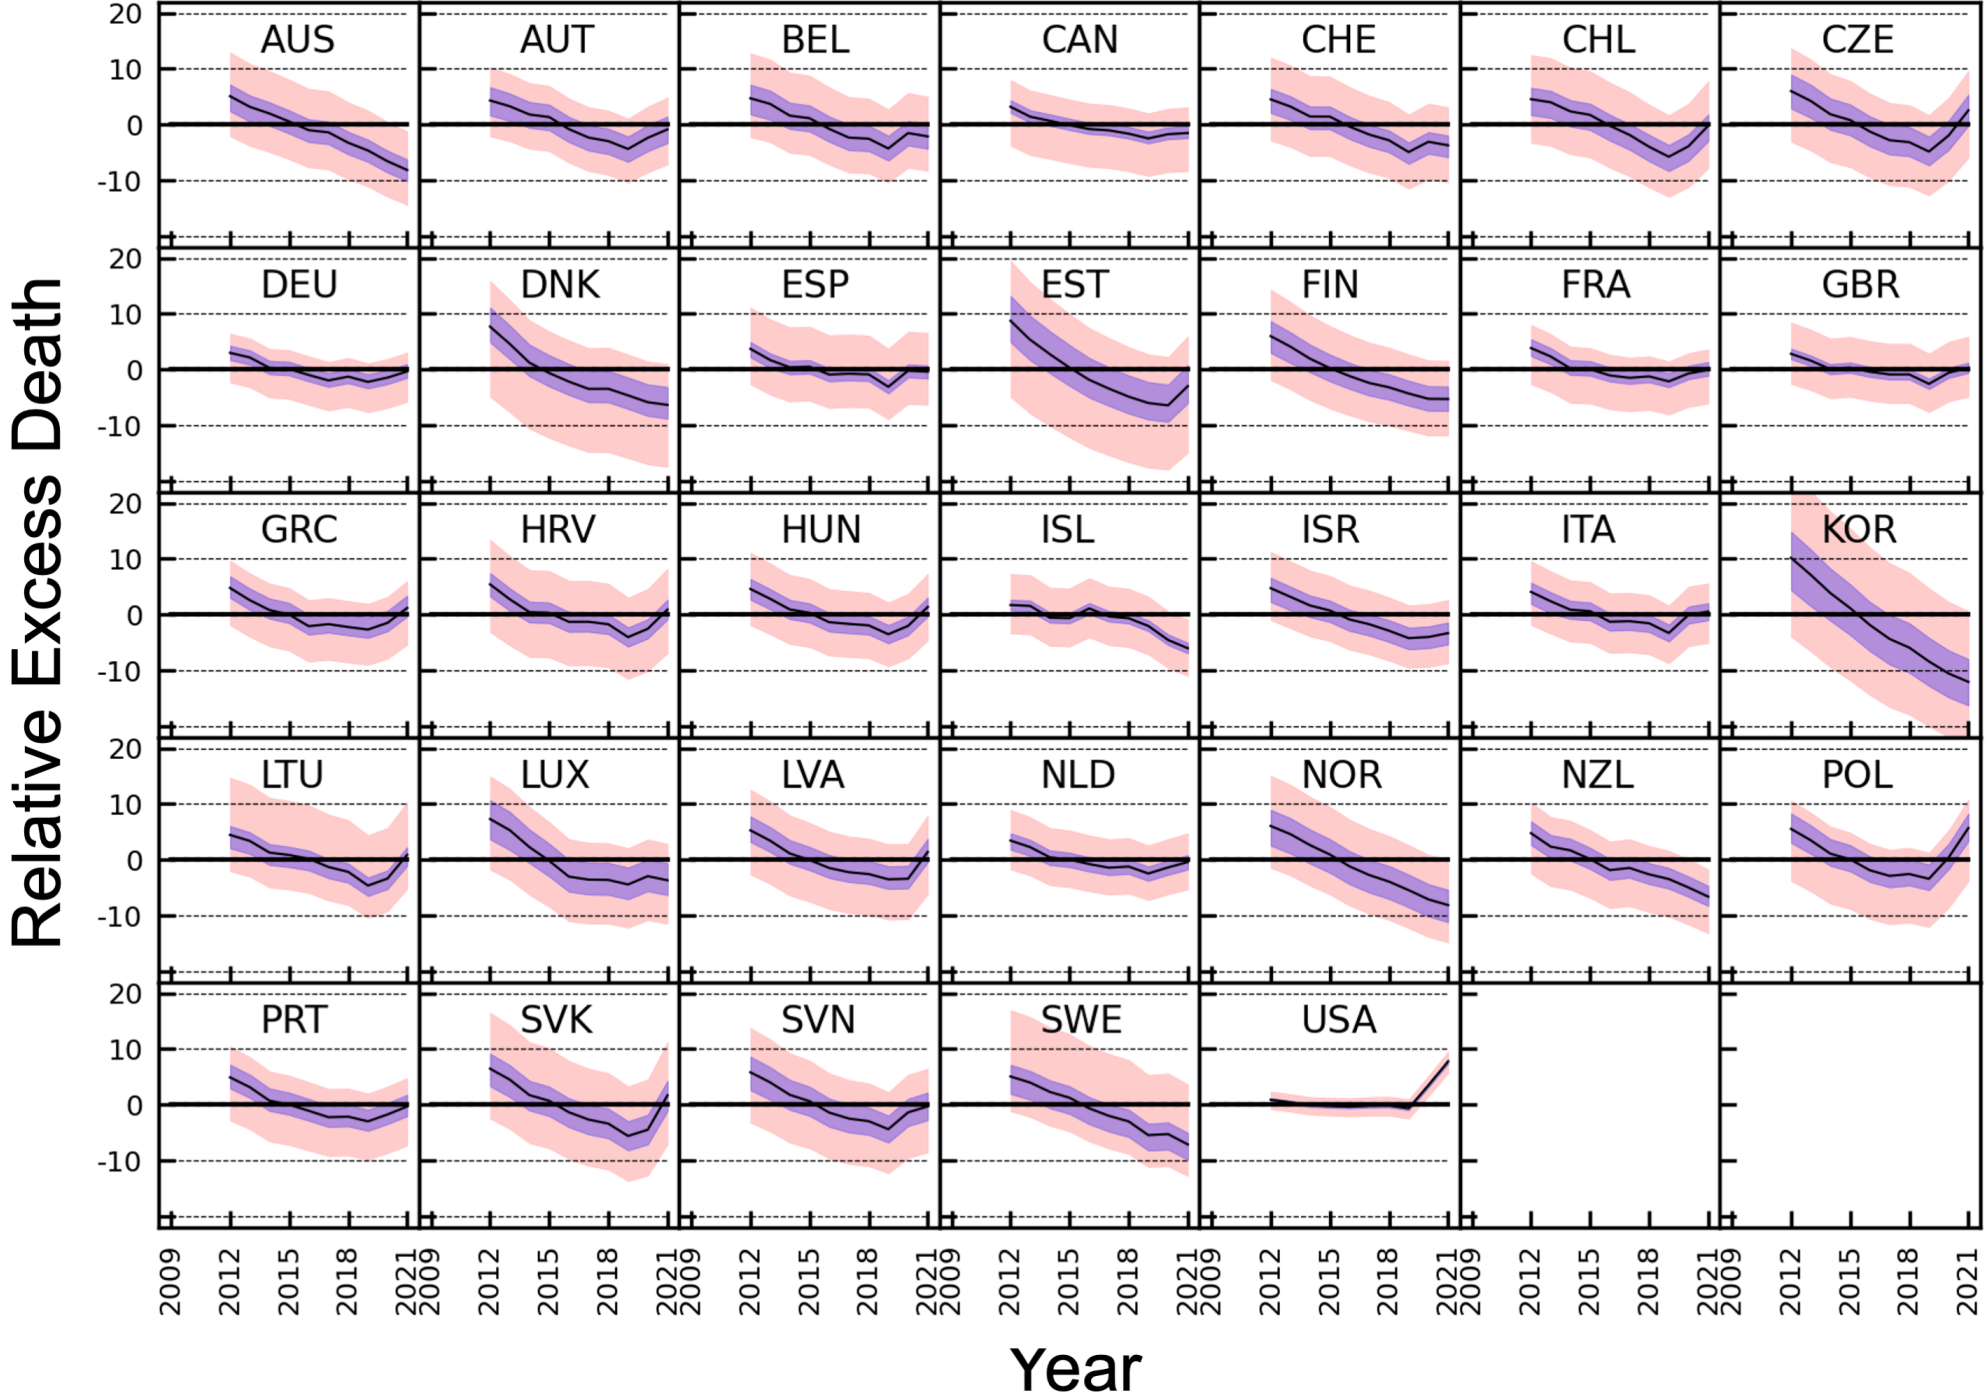

**Table S1A:** Relative percentage excess death, p%, in a single year for all countries and all years. Countries are listed in alphabetical order. Shading varies from solid green for the lowest values to solid red for the highest values. The shading is calibrated by range of values in all Tables S1 considered together. Note that 2019, the year immediately preceding the pandemics, is ‘greenest’ for all countries (low p%). By the same measure 2009 is ‘reddest’ (high p%).

| Country        | 2009  | 2010  | 2011 | 2012  | 2013  | 2014  | 2015  | 2016  | 2017  | 2018  | 2019   | 2020   | 2021   |
|----------------|-------|-------|------|-------|-------|-------|-------|-------|-------|-------|--------|--------|--------|
| Australia      | 7.36  | 5.18  | 4.76 | 3.24  | -0.21 | 0.34  | -1.03 | -3.01 | -1.81 | -7.02 | -6.60  | -10.63 | -8.36  |
| Austria        | 6.78  | 4.66  | 1.99 | 3.91  | 2.54  | -1.19 | 0.22  | -4.67 | -3.64 | -3.77 | -5.47  | 3.24   | 2.38   |
| Belgium        | 7.23  | 5.34  | 2.06 | 4.33  | 3.10  | -3.00 | 0.24  | -3.37 | -3.27 | -3.69 | -6.82  | 7.45   | -5.54  |
| Canada         | 7.25  | 3.49  | 2.00 | 0.39  | -0.13 | 0.46  | -1.17 | -2.36 | -1.10 | -1.96 | -4.48  | 0.53   | -0.33  |
| Chile          | 4.02  | 8.07  | 2.54 | 3.59  | 1.95  | 1.38  | 0.07  | -3.97 | -4.55 | -7.06 | -7.42  | 3.11   | 9.66   |
| Croatia        | 8.98  | 7.17  | 3.09 | 2.63  | -1.70 | -2.15 | 2.41  | -3.84 | -1.63 | -3.87 | -6.86  | 2.03   | 12.04  |
| Czechia        | 9.54  | 6.82  | 4.55 | 3.29  | 2.42  | -2.70 | 0.30  | -4.90 | -3.87 | -4.11 | -6.49  | 6.36   | 14.03  |
| Denmark        | 13.31 | 10.62 | 4.82 | 2.40  | 0.71  | -2.97 | -2.62 | -3.82 | -4.59 | -2.94 | -7.26  | -8.63  | -6.54  |
| Estonia        | 14.52 | 11.13 | 5.58 | 4.07  | 0.77  | 0.67  | -3.98 | -4.77 | -5.58 | -5.26 | -8.49  | -6.51  | 7.99   |
| Finland        | 8.21  | 8.01  | 4.32 | 3.62  | 0.64  | -0.73 | -2.40 | -2.21 | -4.33 | -3.89 | -6.80  | -6.08  | -4.54  |
| France         | 6.76  | 4.93  | 0.89 | 2.90  | 0.61  | -3.51 | 0.17  | -1.60 | -1.20 | -2.37 | -3.42  | 3.92   | 1.34   |
| Germany        | 5.37  | 4.14  | 1.39 | 1.08  | 1.99  | -3.25 | 0.50  | -3.16 | -2.07 | -0.47 | -3.31  | -0.12  | 2.35   |
| Greece         | 6.76  | 4.41  | 3.09 | 4.93  | -1.89 | -2.60 | -0.28 | -3.63 | -0.48 | -4.57 | -2.16  | 1.12   | 10.06  |
| Hungary        | 6.72  | 5.81  | 3.32 | 2.57  | -0.32 | -1.83 | 0.80  | -4.15 | -1.57 | -2.84 | -5.59  | 1.73   | 11.94  |
| Iceland        | 5.23  | 5.20  | 0.67 | -3.92 | 4.30  | -3.34 | 0.26  | 3.13  | -1.54 | -4.32 | -5.16  | -7.05  | -7.56  |
| Israel         | 5.89  | 4.83  | 4.43 | 3.86  | -0.17 | -1.31 | 0.69  | -2.72 | -3.55 | -5.83 | -4.78  | -2.09  | -0.93  |
| Italy          | 6.11  | 3.08  | 3.50 | 3.67  | -0.60 | -2.85 | 2.23  | -3.95 | -0.26 | -4.22 | -4.84  | 8.86   | 2.10   |
| Latvia         | 7.84  | 8.13  | 2.31 | 2.88  | 0.45  | -1.09 | -2.36 | -2.88 | -2.65 | -2.43 | -6.11  | -2.49  | 16.58  |
| Lithuania      | 6.54  | 6.64  | 3.06 | 1.60  | 2.24  | -1.71 | 1.24  | -1.06 | -3.71 | -5.16 | -8.61  | 3.90   | 13.35  |
| Luxembourg     | 8.10  | 9.30  | 6.89 | 5.08  | 0.37  | -2.75 | -2.97 | -6.44 | -2.11 | -3.04 | -6.21  | -0.48  | -5.04  |
| Netherlands    | 5.33  | 4.39  | 1.63 | 2.50  | 0.61  | -2.92 | 0.03  | -0.87 | -1.99 | -2.00 | -4.94  | 3.25   | 1.79   |
| New Zealand    | 7.46  | 2.95  | 5.99 | 2.81  | -2.15 | 0.33  | -0.49 | -5.00 | -0.67 | -4.28 | -3.92  | -10.70 | -7.48  |
| Norway         | 7.64  | 6.77  | 4.84 | 5.01  | 1.82  | -1.10 | -1.85 | -3.53 | -4.46 | -5.78 | -8.00  | -10.13 | -8.63  |
| Poland         | 9.69  | 6.22  | 3.27 | 3.17  | 1.48  | -3.33 | -0.88 | -4.64 | -2.76 | -2.00 | -4.32  | 10.43  | 18.09  |
| Portugal       | 8.03  | 7.03  | 1.29 | 3.40  | 0.95  | -2.71 | -1.54 | -1.13 | -3.68 | -2.31 | -4.88  | 3.58   | 2.05   |
| Slovakia       | 9.24  | 8.91  | 4.36 | 3.55  | 1.23  | -2.18 | 0.23  | -4.65 | -4.08 | -5.04 | -8.67  | -0.38  | 19.91  |
| Slovenia       | 9.46  | 6.01  | 3.94 | 4.07  | 2.06  | -2.80 | -0.66 | -4.14 | -2.45 | -4.56 | -6.44  | 7.54   | 1.86   |
| South Korea    | 14.72 | 11.48 | 7.96 | 7.20  | 2.47  | -1.52 | -2.79 | -5.17 | -7.62 | -7.81 | -12.61 | -13.83 | -13.72 |
| Spain          | 6.58  | 3.15  | 1.93 | 3.22  | -1.46 | -2.13 | 2.32  | -2.48 | -0.81 | -2.50 | -6.59  | 8.70   | -1.49  |
| Sweden         | 6.33  | 5.68  | 3.54 | 4.62  | 1.95  | -0.95 | -0.62 | -3.02 | -3.48 | -4.90 | -10.38 | -2.44  | -10.83 |
| Switzerland    | 7.63  | 5.65  | 2.06 | 2.90  | 2.36  | -1.48 | 1.95  | -4.15 | -3.42 | -5.47 | -6.63  | 2.89   | -5.82  |
| United Kingdom | 5.57  | 4.04  | 0.47 | 1.25  | 0.62  | -2.13 | 1.52  | -1.69 | -1.29 | -2.05 | -5.32  | 6.09   | 2.27   |
| United States  | 1.67  | 0.89  | 0.92 | 0.01  | -0.20 | -1.18 | 0.30  | -0.50 | 0.43  | -0.92 | -1.69  | 15.73  | 17.65  |

**Table S1B:** Relative percentage excess death, p%, in two adjacent years for all countries and all years. When considering a two-year projected period, 2009 is added to 2010 and the combined period 2009+2010 is denoted as ‘2010’. For this reason, the entry for 2009 is marked as NA.

| Country               | 2009 | 2010  | 2011 | 2012  | 2013  | 2014  | 2015  | 2016  | 2017  | 2018  | 2019   | 2020   | 2021   |
|-----------------------|------|-------|------|-------|-------|-------|-------|-------|-------|-------|--------|--------|--------|
| <b>Australia</b>      | NA   | 6.25  | 4.97 | 3.98  | 1.49  | 0.07  | -0.36 | -2.04 | -2.41 | -4.45 | -6.81  | -8.64  | -9.48  |
| <b>Austria</b>        | NA   | 5.71  | 3.32 | 2.96  | 3.22  | 0.66  | -0.47 | -2.25 | -4.15 | -3.71 | -4.63  | -1.10  | 2.81   |
| <b>Belgium</b>        | NA   | 6.27  | 3.68 | 3.21  | 3.71  | 0.02  | -1.37 | -1.58 | -3.32 | -3.48 | -5.27  | 0.35   | 0.93   |
| <b>Canada</b>         | NA   | 5.31  | 2.73 | 1.18  | 0.12  | 0.17  | -0.35 | -1.78 | -1.72 | -1.53 | -3.23  | -1.94  | 0.09   |
| <b>Chile</b>          | NA   | 6.09  | 5.28 | 3.07  | 2.76  | 1.67  | 0.72  | -2.01 | -4.26 | -5.82 | -7.24  | -2.08  | 6.43   |
| <b>Croatia</b>        | NA   | 8.07  | 5.11 | 2.85  | 0.45  | -1.92 | 0.15  | -0.74 | -2.73 | -2.76 | -5.37  | -2.40  | 7.04   |
| <b>Czechia</b>        | NA   | 8.16  | 5.67 | 3.92  | 2.86  | -0.17 | -1.19 | -2.33 | -4.38 | -3.99 | -5.31  | -0.02  | 10.20  |
| <b>Denmark</b>        | NA   | 11.95 | 7.69 | 3.60  | 1.55  | -1.15 | -2.79 | -3.22 | -4.21 | -3.76 | -5.12  | -7.95  | -7.57  |
| <b>Estonia</b>        | NA   | 12.81 | 8.33 | 4.82  | 2.40  | 0.72  | -1.68 | -4.38 | -5.17 | -5.42 | -6.88  | -7.49  | 0.78   |
| <b>Finland</b>        | NA   | 8.11  | 6.14 | 3.97  | 2.11  | -0.05 | -1.58 | -2.31 | -3.28 | -4.11 | -5.36  | -6.44  | -5.30  |
| <b>France</b>         | NA   | 5.84  | 2.88 | 1.91  | 1.74  | -1.48 | -1.65 | -0.72 | -1.40 | -1.79 | -2.90  | 0.27   | 2.62   |
| <b>Germany</b>        | NA   | 4.75  | 2.75 | 1.23  | 1.54  | -0.66 | -1.35 | -1.35 | -2.61 | -1.27 | -1.90  | -1.70  | 1.13   |
| <b>Greece</b>         | NA   | 5.56  | 3.74 | 4.02  | 1.47  | -2.25 | -1.42 | -1.97 | -2.04 | -2.53 | -3.36  | -0.51  | 5.62   |
| <b>Hungary</b>        | NA   | 6.26  | 4.56 | 2.94  | 1.12  | -1.08 | -0.51 | -1.69 | -2.85 | -2.21 | -4.23  | -1.91  | 6.84   |
| <b>Iceland</b>        | NA   | 5.22  | 2.91 | -1.66 | 0.24  | 0.43  | -1.52 | 1.71  | 0.77  | -2.95 | -4.75  | -6.12  | -7.31  |
| <b>Israel</b>         | NA   | 5.35  | 4.62 | 4.14  | 1.81  | -0.75 | -0.30 | -1.03 | -3.14 | -4.71 | -5.30  | -3.42  | -1.50  |
| <b>Italy</b>          | NA   | 4.56  | 3.30 | 3.59  | 1.51  | -1.74 | -0.29 | -0.89 | -2.09 | -2.25 | -4.53  | 2.05   | 5.45   |
| <b>Latvia</b>         | NA   | 7.98  | 5.21 | 2.59  | 1.66  | -0.33 | -1.73 | -2.62 | -2.77 | -2.54 | -4.27  | -4.30  | 7.06   |
| <b>Lithuania</b>      | NA   | 6.59  | 4.84 | 2.32  | 1.92  | 0.26  | -0.23 | 0.09  | -2.39 | -4.44 | -6.89  | -2.35  | 8.62   |
| <b>Luxembourg</b>     | NA   | 8.71  | 8.08 | 5.97  | 2.68  | -1.22 | -2.86 | -4.73 | -4.24 | -2.58 | -4.64  | -3.32  | -2.78  |
| <b>Netherlands</b>    | NA   | 4.86  | 2.99 | 2.07  | 1.55  | -1.18 | -1.43 | -0.43 | -1.44 | -2.00 | -3.48  | -0.80  | 2.51   |
| <b>New Zealand</b>    | NA   | 5.16  | 4.49 | 4.38  | 0.30  | -0.89 | -0.08 | -2.78 | -2.80 | -2.50 | -4.10  | -7.36  | -9.07  |
| <b>Norway</b>         | NA   | 7.20  | 5.80 | 4.92  | 3.41  | 0.35  | -1.48 | -2.70 | -4.00 | -5.13 | -6.90  | -9.08  | -9.37  |
| <b>Poland</b>         | NA   | 7.94  | 4.73 | 3.22  | 2.31  | -0.96 | -2.09 | -2.78 | -3.69 | -2.38 | -3.17  | 3.10   | 14.29  |
| <b>Portugal</b>       | NA   | 7.52  | 4.13 | 2.36  | 2.16  | -0.90 | -2.12 | -1.34 | -2.41 | -2.99 | -3.60  | -0.62  | 2.80   |
| <b>Slovakia</b>       | NA   | 9.07  | 6.62 | 3.95  | 2.38  | -0.50 | -0.97 | -2.24 | -4.36 | -4.56 | -6.87  | -4.48  | 9.86   |
| <b>Slovenia</b>       | NA   | 7.71  | 4.96 | 4.01  | 3.05  | -0.40 | -1.72 | -2.42 | -3.29 | -3.52 | -5.51  | 0.61   | 4.68   |
| <b>South Korea</b>    | NA   | 13.04 | 9.69 | 7.57  | 4.78  | 0.43  | -2.17 | -4.00 | -6.42 | -7.72 | -10.26 | -13.23 | -13.77 |
| <b>Spain</b>          | NA   | 4.84  | 2.53 | 2.59  | 0.86  | -1.80 | 0.11  | -0.11 | -1.64 | -1.66 | -4.57  | 1.11   | 3.59   |
| <b>Sweden</b>         | NA   | 6.00  | 4.61 | 4.08  | 3.27  | 0.49  | -0.79 | -1.83 | -3.25 | -4.19 | -7.66  | -6.37  | -6.67  |
| <b>Switzerland</b>    | NA   | 6.63  | 3.84 | 2.49  | 2.63  | 0.42  | 0.25  | -1.13 | -3.78 | -4.45 | -6.06  | -1.82  | -1.50  |
| <b>United Kingdom</b> | NA   | 4.79  | 2.24 | 0.86  | 0.94  | -0.77 | -0.30 | -0.12 | -1.49 | -1.67 | -3.70  | 0.43   | 4.17   |
| <b>United States</b>  | NA   | 1.27  | 0.91 | 0.46  | -0.10 | -0.70 | -0.44 | -0.10 | -0.03 | -0.25 | -1.31  | 7.05   | 16.69  |

**Table S1C:** Relative percentage excess death, p%, in three adjacent years for all countries and all years. When considering three-year projected periods, 2009 and 2010 are added to 2011 and the combined period 2009+2010+2011 is denoted as ‘2011’. For this reason, the entries for both 2009 and 2010 are marked as NA.

| Country               | 2009 | 2010 | 2011  | 2012 | 2013 | 2014  | 2015  | 2016  | 2017  | 2018  | 2019  | 2020   | 2021   |
|-----------------------|------|------|-------|------|------|-------|-------|-------|-------|-------|-------|--------|--------|
| <b>Australia</b>      | NA   | NA   | 5.73  | 4.37 | 2.55 | 1.09  | -0.31 | -1.27 | -1.96 | -3.98 | -5.19 | -8.12  | -8.55  |
| <b>Austria</b>        | NA   | NA   | 4.45  | 3.52 | 2.82 | 1.72  | 0.51  | -1.91 | -2.72 | -4.02 | -4.30 | -1.98  | 0.07   |
| <b>Belgium</b>        | NA   | NA   | 4.84  | 3.90 | 3.17 | 1.43  | 0.10  | -2.05 | -2.15 | -3.45 | -4.61 | -0.98  | -1.63  |
| <b>Canada</b>         | NA   | NA   | 4.17  | 1.93 | 0.73 | 0.24  | -0.28 | -1.04 | -1.55 | -1.80 | -2.54 | -1.95  | -1.39  |
| <b>Chile</b>          | NA   | NA   | 4.87  | 4.70 | 2.69 | 2.29  | 1.13  | -0.91 | -2.89 | -5.23 | -6.37 | -3.69  | 1.95   |
| <b>Croatia</b>        | NA   | NA   | 6.38  | 4.27 | 1.31 | -0.43 | -0.46 | -1.20 | -1.04 | -3.11 | -4.14 | -2.88  | 2.44   |
| <b>Czechia</b>        | NA   | NA   | 6.93  | 4.86 | 3.41 | 0.97  | -0.01 | -2.45 | -2.85 | -4.29 | -4.84 | -1.36  | 4.70   |
| <b>Denmark</b>        | NA   | NA   | 9.53  | 5.89 | 2.62 | 0.01  | -1.65 | -3.14 | -3.69 | -3.78 | -4.95 | -6.32  | -7.47  |
| <b>Estonia</b>        | NA   | NA   | 10.37 | 6.88 | 3.44 | 1.81  | -0.88 | -2.73 | -4.78 | -5.20 | -6.45 | -6.76  | -2.28  |
| <b>Finland</b>        | NA   | NA   | 6.81  | 5.28 | 2.83 | 1.14  | -0.86 | -1.79 | -2.99 | -3.49 | -5.02 | -5.60  | -5.79  |
| <b>France</b>         | NA   | NA   | 4.15  | 2.89 | 1.47 | -0.05 | -0.91 | -1.63 | -0.88 | -1.73 | -2.34 | -0.60  | 0.63   |
| <b>Germany</b>        | NA   | NA   | 3.61  | 2.18 | 1.49 | -0.09 | -0.26 | -1.97 | -1.59 | -1.89 | -1.96 | -1.30  | -0.33  |
| <b>Greece</b>         | NA   | NA   | 4.70  | 4.15 | 2.00 | 0.08  | -1.57 | -2.17 | -1.46 | -2.89 | -2.41 | -1.85  | 3.06   |
| <b>Hungary</b>        | NA   | NA   | 5.27  | 3.89 | 1.84 | 0.12  | -0.44 | -1.74 | -1.65 | -2.85 | -3.35 | -2.22  | 2.73   |
| <b>Iceland</b>        | NA   | NA   | 3.67  | 0.58 | 0.38 | -0.98 | 0.38  | 0.07  | 0.60  | -0.97 | -3.71 | -5.53  | -6.61  |
| <b>Israel</b>         | NA   | NA   | 5.03  | 4.36 | 2.65 | 0.74  | -0.26 | -1.12 | -1.89 | -4.06 | -4.73 | -4.20  | -2.56  |
| <b>Italy</b>          | NA   | NA   | 4.19  | 3.42 | 2.16 | 0.02  | -0.39 | -1.53 | -0.68 | -2.81 | -3.12 | -0.01  | 2.07   |
| <b>Latvia</b>         | NA   | NA   | 6.08  | 4.43 | 1.87 | 0.73  | -1.01 | -2.12 | -2.63 | -2.65 | -3.73 | -3.68  | 2.68   |
| <b>Lithuania</b>      | NA   | NA   | 5.41  | 3.75 | 2.30 | 0.70  | 0.59  | -0.50 | -1.18 | -3.31 | -5.83 | -3.28  | 2.89   |
| <b>Luxembourg</b>     | NA   | NA   | 8.09  | 7.05 | 4.04 | 0.80  | -1.83 | -4.09 | -3.83 | -3.83 | -3.82 | -3.23  | -3.90  |
| <b>Netherlands</b>    | NA   | NA   | 3.75  | 2.83 | 1.57 | 0.02  | -0.77 | -1.24 | -0.96 | -1.63 | -3.00 | -1.19  | 0.08   |
| <b>New Zealand</b>    | NA   | NA   | 5.45  | 3.92 | 2.15 | 0.31  | -0.75 | -1.77 | -2.05 | -3.31 | -2.98 | -6.36  | -7.40  |
| <b>Norway</b>         | NA   | NA   | 6.40  | 5.53 | 3.88 | 1.88  | -0.39 | -2.17 | -3.29 | -4.60 | -6.10 | -8.00  | -8.93  |
| <b>Poland</b>         | NA   | NA   | 6.35  | 4.20 | 2.62 | 0.39  | -0.93 | -2.96 | -2.78 | -3.12 | -3.03 | 1.43   | 8.18   |
| <b>Portugal</b>       | NA   | NA   | 5.39  | 3.88 | 1.88 | 0.50  | -1.12 | -1.79 | -2.13 | -2.38 | -3.63 | -1.17  | 0.29   |
| <b>Slovakia</b>       | NA   | NA   | 7.48  | 5.58 | 3.03 | 0.83  | -0.25 | -2.22 | -2.86 | -4.59 | -5.96 | -4.67  | 3.80   |
| <b>Slovenia</b>       | NA   | NA   | 6.42  | 4.66 | 3.34 | 1.05  | -0.49 | -2.55 | -2.43 | -3.72 | -4.52 | -1.08  | 1.04   |
| <b>South Korea</b>    | NA   | NA   | 11.26 | 8.83 | 5.80 | 2.59  | -0.69 | -3.21 | -5.26 | -6.91 | -9.42 | -11.50 | -13.40 |
| <b>Spain</b>          | NA   | NA   | 3.84  | 2.77 | 1.21 | -0.16 | -0.40 | -0.77 | -0.35 | -1.93 | -3.34 | -0.07  | 0.24   |
| <b>Sweden</b>         | NA   | NA   | 5.17  | 4.61 | 3.36 | 1.85  | 0.11  | -1.54 | -2.39 | -3.81 | -6.29 | -5.89  | -7.89  |
| <b>Switzerland</b>    | NA   | NA   | 5.07  | 3.52 | 2.44 | 1.23  | 0.94  | -1.25 | -1.91 | -4.35 | -5.20 | -3.01  | -3.18  |
| <b>United Kingdom</b> | NA   | NA   | 3.31  | 1.90 | 0.78 | -0.11 | 0.00  | -0.78 | -0.52 | -1.68 | -2.91 | -0.39  | 1.05   |
| <b>United States</b>  | NA   | NA   | 1.15  | 0.60 | 0.24 | -0.47 | -0.36 | -0.46 | 0.08  | -0.33 | -0.74 | 4.42   | 10.60  |

**Table S1D:** Percentage excess death, p%, in four adjacent years for all countries and all years. When considering four-year projected periods, 2009, 2010 and 2011 are added to 2012 and the combined period 2009+2010+2011+2012 is denoted as ‘2012’. For this reason, the entries for both 2009, 2010 and 2011 are marked as NA. With a longer projected period, the relative percentage excess death gets smaller for every country.

| Country               | 2009 | 2010 | 2011 | 2012  | 2013 | 2014  | 2015  | 2016  | 2017  | 2018  | 2019  | 2020   | 2021   |
|-----------------------|------|------|------|-------|------|-------|-------|-------|-------|-------|-------|--------|--------|
| <b>Australia</b>      | NA   | NA   | NA   | 5.08  | 3.17 | 1.97  | 0.54  | -1.02 | -1.41 | -3.27 | -4.66 | -6.61  | -8.18  |
| <b>Austria</b>        | NA   | NA   | NA   | 4.31  | 3.27 | 1.79  | 1.33  | -0.83 | -2.35 | -2.99 | -4.39 | -2.39  | -0.88  |
| <b>Belgium</b>        | NA   | NA   | NA   | 4.71  | 3.70 | 1.58  | 1.13  | -0.79 | -2.36 | -2.54 | -4.31 | -1.54  | -2.14  |
| <b>Canada</b>         | NA   | NA   | NA   | 3.17  | 1.39 | 0.66  | -0.12 | -0.82 | -1.06 | -1.65 | -2.50 | -1.74  | -1.53  |
| <b>Chile</b>          | NA   | NA   | NA   | 4.54  | 3.98 | 2.35  | 1.72  | -0.22 | -1.87 | -3.99 | -5.80 | -3.89  | -0.21  |
| <b>Croatia</b>        | NA   | NA   | NA   | 5.42  | 2.74 | 0.42  | 0.29  | -1.32 | -1.31 | -1.76 | -4.07 | -2.57  | 0.88   |
| <b>Czechia</b>        | NA   | NA   | NA   | 6.00  | 4.24 | 1.84  | 0.79  | -1.27 | -2.82 | -3.18 | -4.86 | -1.97  | 2.54   |
| <b>Denmark</b>        | NA   | NA   | NA   | 7.70  | 4.56 | 1.18  | -0.66 | -2.20 | -3.51 | -3.49 | -4.67 | -5.90  | -6.38  |
| <b>Estonia</b>        | NA   | NA   | NA   | 8.75  | 5.30 | 2.72  | 0.31  | -1.89 | -3.46 | -4.91 | -6.04 | -6.47  | -3.01  |
| <b>Finland</b>        | NA   | NA   | NA   | 5.98  | 4.07 | 1.90  | 0.22  | -1.21 | -2.45 | -3.22 | -4.33 | -5.29  | -5.33  |
| <b>France</b>         | NA   | NA   | NA   | 3.82  | 2.30 | 0.18  | 0.01  | -1.09 | -1.52 | -1.27 | -2.16 | -0.74  | -0.10  |
| <b>Germany</b>        | NA   | NA   | NA   | 2.96  | 2.13 | 0.27  | 0.06  | -1.01 | -1.99 | -1.31 | -2.25 | -1.49  | -0.36  |
| <b>Greece</b>         | NA   | NA   | NA   | 4.76  | 2.57 | 0.80  | -0.02 | -2.11 | -1.74 | -2.25 | -2.71 | -1.51  | 1.18   |
| <b>Hungary</b>        | NA   | NA   | NA   | 4.59  | 2.82 | 0.91  | 0.30  | -1.39 | -1.70 | -1.95 | -3.55 | -2.06  | 1.36   |
| <b>Iceland</b>        | NA   | NA   | NA   | 1.71  | 1.54 | -0.59 | -0.66 | 1.09  | -0.35 | -0.68 | -2.06 | -4.57  | -6.06  |
| <b>Israel</b>         | NA   | NA   | NA   | 4.73  | 3.17 | 1.62  | 0.73  | -0.90 | -1.75 | -2.91 | -4.24 | -4.05  | -3.35  |
| <b>Italy</b>          | NA   | NA   | NA   | 4.06  | 2.38 | 0.86  | 0.59  | -1.30 | -1.21 | -1.58 | -3.33 | -0.07  | 0.53   |
| <b>Latvia</b>         | NA   | NA   | NA   | 5.27  | 3.42 | 1.12  | -0.06 | -1.49 | -2.25 | -2.58 | -3.52 | -3.42  | 1.40   |
| <b>Lithuania</b>      | NA   | NA   | NA   | 4.44  | 3.37 | 1.28  | 0.84  | 0.17  | -1.31 | -2.18 | -4.65 | -3.39  | 0.88   |
| <b>Luxembourg</b>     | NA   | NA   | NA   | 7.30  | 5.30 | 2.25  | -0.19 | -3.04 | -3.58 | -3.63 | -4.45 | -2.96  | -3.69  |
| <b>Netherlands</b>    | NA   | NA   | NA   | 3.43  | 2.25 | 0.41  | 0.02  | -0.79 | -1.44 | -1.23 | -2.48 | -1.39  | -0.42  |
| <b>New Zealand</b>    | NA   | NA   | NA   | 4.76  | 2.34 | 1.67  | 0.10  | -1.86 | -1.48 | -2.63 | -3.47 | -4.99  | -6.65  |
| <b>Norway</b>         | NA   | NA   | NA   | 6.05  | 4.59 | 2.61  | 0.93  | -1.19 | -2.76 | -3.93 | -5.47 | -7.14  | -8.16  |
| <b>Poland</b>         | NA   | NA   | NA   | 5.53  | 3.49 | 1.08  | 0.06  | -1.89 | -2.91 | -2.58 | -3.43 | 0.40   | 5.69   |
| <b>Portugal</b>       | NA   | NA   | NA   | 4.88  | 3.12 | 0.70  | -0.02 | -1.12 | -2.27 | -2.17 | -3.02 | -1.78  | -0.34  |
| <b>Slovakia</b>       | NA   | NA   | NA   | 6.48  | 4.47 | 1.69  | 0.67  | -1.39 | -2.70 | -3.43 | -5.64 | -4.52  | 1.66   |
| <b>Slovenia</b>       | NA   | NA   | NA   | 5.81  | 3.98 | 1.74  | 0.60  | -1.44 | -2.52 | -2.99 | -4.42 | -1.41  | -0.32  |
| <b>South Korea</b>    | NA   | NA   | NA   | 10.17 | 7.13 | 3.84  | 1.15  | -1.88 | -4.39 | -5.94 | -8.43 | -10.59 | -12.09 |
| <b>Spain</b>          | NA   | NA   | NA   | 3.68  | 1.68 | 0.35  | 0.48  | -0.94 | -0.78 | -0.90 | -3.13 | -0.25  | -0.43  |
| <b>Sweden</b>         | NA   | NA   | NA   | 5.03  | 3.93 | 2.26  | 1.22  | -0.69 | -2.04 | -3.03 | -5.49 | -5.30  | -7.16  |
| <b>Switzerland</b>    | NA   | NA   | NA   | 4.51  | 3.22 | 1.43  | 1.41  | -0.38 | -1.81 | -2.83 | -4.94 | -3.11  | -3.73  |
| <b>United Kingdom</b> | NA   | NA   | NA   | 2.78  | 1.57 | 0.03  | 0.31  | -0.44 | -0.91 | -0.91 | -2.61 | -0.61  | 0.29   |
| <b>United States</b>  | NA   | NA   | NA   | 0.86  | 0.40 | -0.13 | -0.27 | -0.39 | -0.23 | -0.18 | -0.68 | 3.45   | 7.77   |

**Table S2:** The percentage excess death , p%, of the worst, the second worst and third worst pairs of adjacent years compared to the corresponding value in two-year pandemic projected period 2020+2021. Those entries where the two-year pandemic period 2020+2021 are worst are shown in bold type.

| Country              | Worst<br>Pair Years | 2nd Worst<br>Pair Years | 3rd Worst<br>Pair Years | Worst<br>p% | 2nd Worst<br>p% | 3rd Worst<br>p% | 2020+2021<br>p% | Worst minus<br>(2020+2021) p% |
|----------------------|---------------------|-------------------------|-------------------------|-------------|-----------------|-----------------|-----------------|-------------------------------|
| Australia            | 2009+2010           | 2010+2011               | 2011+2012               | 6.2         | 5.0             | 4.0             | -9.5            | 15.7                          |
| Austria              | 2009+2010           | 2010+2011               | 2012+2013               | 5.7         | 3.3             | 3.2             | 2.8             | 2.9                           |
| Belgium              | 2009+2010           | 2012+2013               | 2010+2011               | 6.3         | 3.7             | 3.7             | 0.9             | 5.3                           |
| Canada               | 2009+2010           | 2010+2011               | 2011+2012               | 5.3         | 2.7             | 1.2             | 0.1             | 5.2                           |
| Switzerland          | 2009+2010           | 2010+2011               | 2012+2013               | 6.6         | 3.8             | 2.6             | -1.5            | 8.1                           |
| Chile                | <b>2020+2021</b>    | 2009+2010               | 2010+2011               | <b>6.4</b>  | 6.1             | 5.3             | 6.4             | 0.0                           |
| Czechia              | <b>2020+2021</b>    | 2009+2010               | 2010+2011               | <b>10.2</b> | 8.2             | 5.7             | 10.2            | 0.0                           |
| Germany              | 2009+2010           | 2010+2011               | 2012+2013               | 4.8         | 2.8             | 1.5             | 1.1             | 3.6                           |
| Denmark              | 2009+2010           | 2010+2011               | 2011+2012               | 12.0        | 7.7             | 3.6             | -7.6            | 19.5                          |
| Spain                | 2009+2010           | <b>2020+2021</b>        | 2011+2012               | 4.8         | <b>3.6</b>      | 2.6             | 3.6             | 1.3                           |
| Estonia              | 2009+2010           | 2010+2011               | 2011+2012               | 12.8        | 8.3             | 4.8             | 0.8             | 12.0                          |
| Finland              | 2009+2010           | 2010+2011               | 2011+2012               | 8.1         | 6.1             | 4.0             | -5.3            | 13.4                          |
| France               | 2009+2010           | 2010+2011               | <b>2020+2021</b>        | 5.8         | 2.9             | <b>2.6</b>      | 2.6             | 3.2                           |
| United Kingdom       | 2009+2010           | <b>2020+2021</b>        | 2010+2011               | 4.8         | <b>4.2</b>      | 2.2             | 4.2             | 0.6                           |
| Greece               | <b>2020+2021</b>    | 2009+2010               | 2011+2012               | <b>5.6</b>  | 5.6             | 4.0             | 5.6             | 0.0                           |
| Croatia              | 2009+2010           | <b>2020+2021</b>        | 2010+2011               | 8.1         | <b>7.0</b>      | 5.1             | 7.0             | 1.0                           |
| Hungary              | <b>2020+2021</b>    | 2009+2010               | 2010+2011               | <b>6.8</b>  | 6.3             | 4.6             | 6.8             | 0.0                           |
| Iceland              | 2009+2010           | 2010+2011               | 2015+2016               | 5.2         | 2.9             | 1.7             | -7.3            | 12.5                          |
| Israel               | 2009+2010           | 2010+2011               | 2011+2012               | 5.4         | 4.6             | 4.1             | -1.5            | 6.9                           |
| Italy                | <b>2020+2021</b>    | 2009+2010               | 2011+2012               | <b>5.5</b>  | 4.6             | 3.6             | 5.5             | 0.0                           |
| South Korea          | 2009+2010           | 2010+2011               | 2011+2012               | 13.0        | 9.7             | 7.6             | -13.8           | 26.8                          |
| Lithuania            | <b>2020+2021</b>    | 2009+2010               | 2010+2011               | <b>8.6</b>  | 6.6             | 4.8             | 8.6             | 0.0                           |
| Luxembourg           | 2009+2010           | 2010+2011               | 2011+2012               | 8.7         | 8.1             | 6.0             | -2.8            | 11.5                          |
| Latvia               | 2009+2010           | <b>2020+2021</b>        | 2010+2011               | 8.0         | <b>7.1</b>      | 5.2             | 7.1             | 0.9                           |
| Netherlands          | 2009+2010           | 2010+2011               | <b>2020+2021</b>        | 4.9         | 3.0             | <b>2.5</b>      | 2.5             | 2.3                           |
| Norway               | 2009+2010           | 2010+2011               | 2011+2012               | 7.2         | 5.8             | 4.9             | -9.4            | 16.6                          |
| New Zealand          | 2009+2010           | 2010+2011               | 2011+2012               | 5.2         | 4.5             | 4.4             | -9.1            | 14.2                          |
| <b>Poland</b>        | <b>2020+2021</b>    | 2009+2010               | 2010+2011               | <b>14.3</b> | 7.9             | 4.7             | 14.3            | 0.0                           |
| <b>Portugal</b>      | 2009+2010           | 2010+2011               | <b>2020+2021</b>        | 7.5         | 4.1             | <b>2.8</b>      | 2.8             | 4.7                           |
| <b>Slovakia</b>      | <b>2020+2021</b>    | 2009+2010               | 2010+2011               | 9.9         | 9.1             | 6.6             | 9.9             | 0.0                           |
| Slovenia             | 2009+2010           | 2010+2011               | <b>2020+2021</b>        | <b>7.7</b>  | 5.0             | <b>4.7</b>      | 4.7             | 3.0                           |
| Sweden               | 2009+2010           | 2010+2011               | 2011+2012               | 6.0         | 4.6             | 4.1             | -6.7            | 12.7                          |
| <b>United States</b> | <b>2020+2021</b>    | 2019+2020               | 2009+2010               | <b>16.7</b> | 7.0             | 1.3             | 16.7            | 0.0                           |

**Table S3:** Supplementary links to data sources.

| Country                                   | LOC | Death File Name                  | Last Modification Date | Population File Name             | Last Modification Date | Death Download Link                                                                                                                                           | Population Download Link |
|-------------------------------------------|-----|----------------------------------|------------------------|----------------------------------|------------------------|---------------------------------------------------------------------------------------------------------------------------------------------------------------|--------------------------|
| All HMD Short Term Mortality Fluctuations |     | stmf.csv                         | 20-May-2022            | stmf.csv                         | 20-May-2022            | <a href="https://www.mortality.org/File/GetDocument/Public/STMF/Outputs/stmf.csv">https://www.mortality.org/File/GetDocument/Public/STMF/Outputs/stmf.csv</a> |                          |
| Australia                                 | AUS | Australia_Deaths_1x1.txt         | 22-Mar-2022            | Australia_Population.txt         | 22-Mar-2022            | AUS.Deaths_1x1.txt                                                                                                                                            | AUS.Population.txt       |
| Austria                                   | AUT | Austria_Deaths_1x1.txt           | 30-Mar-2021            | Austria_Population.txt           | 30-Mar-2021            | AUT.Deaths_1x1.txt                                                                                                                                            | AUT.Population.txt       |
| Belgium                                   | BEL | Belgium_Deaths_1x1.txt           | 25-Sep-2021            | Belgium_Population.txt           | 25-Sep-2021            | BEL.Deaths_1x1.txt                                                                                                                                            | BEL.Population.txt       |
| Canada                                    | CAN | Canada_Deaths_1x1.txt            | 28-Sep-2021            | Canada_Population.txt            | 28-Sep-2021            | CAN.Deaths_1x1.txt                                                                                                                                            | CAN.Population.txt       |
| Switzerland                               | CHE | Switzerland_Deaths_1x1.txt       | 28-Oct-2021            | Switzerland_Population.txt       | 28-Oct-2021            | CHE.Deaths_1x1.txt                                                                                                                                            | CHE.Population.txt       |
| Chile                                     | CHL | Chile_Deaths_1x1.txt             | 18-Apr-2022            | Chile_Population.txt             | 18-Apr-2022            | CHL.Deaths_1x1.txt                                                                                                                                            | CHL.Population.txt       |
| Czechia                                   | CZE | Czechia_Deaths_1x1.txt           | 23-May-2021            | Czechia_Population.txt           | 23-May-2021            | CZE.Deaths_1x1.txt                                                                                                                                            | CZE.Population.txt       |
| Germany                                   | DEU | Germany_Deaths_1x1.txt           | 17-Dec-2018            | Germany_Population.txt           | 17-Dec-2018            | DEUTNP.Deaths_1x1.txt                                                                                                                                         | DEUTNP.Population.txt    |
| Denmark                                   | DNK | Denmark_Deaths_1x1.txt           | 22-Mar-2022            | Denmark_Population.txt           | 22-Mar-2022            | DNK.Deaths_1x1.txt                                                                                                                                            | DNK.Population.txt       |
| Spain                                     | ESP | Spain_Deaths_1x1.txt             | 23-Feb-2022            | Spain_Population.txt             | 23-Feb-2022            | ESP.Deaths_1x1.txt                                                                                                                                            | ESP.Population.txt       |
| Estonia                                   | EST | Estonia_Deaths_1x1.txt           | 21-Jan-2021            | Estonia_Population.txt           | 21-Jan-2021            | EST.Deaths_1x1.txt                                                                                                                                            | EST.Population.txt       |
| Finland                                   | FIN | Finland_Deaths_1x1.txt           | 02-Aug-2021            | Finland_Population.txt           | 02-Aug-2021            | FIN.Deaths_1x1.txt                                                                                                                                            | FIN.Population.txt       |
| France                                    | FRA | France_Deaths_1x1.txt            | 11-Apr-2022            | France_Population.txt            | 11-Apr-2022            | FRATNP.Deaths_1x1.txt                                                                                                                                         | FRATNP.Population.txt    |
| United Kingdom                            | GBR | UK_Deaths_1x1.txt                | 11-Jul-2020            | UK_Population.txt                | 11-Jul-2020            | GBR_NP.Deaths_1x1.txt                                                                                                                                         | GBR_NP.Population.txt    |
| Greece                                    | GRC | Greece_Deaths_1x1.txt            | 08-Nov-2021            | Greece_Population.txt            | 08-Nov-2021            | GRC.Deaths_1x1.txt                                                                                                                                            | GRC.Population.txt       |
| Croatia                                   | HRV | Croatia_Deaths_1x1.txt           | 24-Feb-2022            | Croatia_Population.txt           | 24-Feb-2022            | HRV.Deaths_1x1.txt                                                                                                                                            | HRV.Population.txt       |
| Hungary                                   | HUN | Hungary_Deaths_1x1.txt           | 30-Nov-2021            | Hungary_Population.txt           | 30-Nov-2021            | HUN.Deaths_1x1.txt                                                                                                                                            | HUN.Population.txt       |
| Iceland                                   | ISL | Iceland_Deaths_1x1.txt           | 02-Apr-2020            | Iceland_Population.txt           | 02-Apr-2020            | ISL.Deaths_1x1.txt                                                                                                                                            | ISL.Population.txt       |
| Israel                                    | ISR | Israel_Deaths_1x1.txt            | 31-Oct-2018            | Israel_Population.txt            | 31-Oct-2018            | ISR.Deaths_1x1.txt                                                                                                                                            | ISR.Population.txt       |
| Italy                                     | ITA | Italy_Deaths_1x1.txt             | 11-Apr-2022            | Italy_Population.txt             | 11-Apr-2022            | ITA.Deaths_1x1.txt                                                                                                                                            | ITA.Population.txt       |
| South Korea                               | KOR | Republic_of_Korea_Deaths_1x1.txt | 15-Nov-2019            | Republic_of_Korea_Population.txt | 15-Nov-2019            | KOR.Deaths_1x1.txt                                                                                                                                            | KOR.Population.txt       |
| Lithuania                                 | LTU | Lithuania_Deaths_1x1.txt         | 29-Jan-2022            | Lithuania_Population.txt         | 29-Jan-2022            | LTU.Deaths_1x1.txt                                                                                                                                            | LTU.Population.txt       |
| Luxembourg                                | LUX | Luxembourg_Deaths_1x1.txt        | 21-Jan-2022            | Luxembourg_Population.txt        | 21-Jan-2022            | LUX.Deaths_1x1.txt                                                                                                                                            | LUX.Population.txt       |
| Latvia                                    | LVA | Latvia_Deaths_1x1.txt            | 11-Mar-2021            | Latvia_Population.txt            | 11-Mar-2021            | LVA.Deaths_1x1.txt                                                                                                                                            | LVA.Population.txt       |
| Netherlands                               | NLD | Netherlands_Deaths_1x1.txt       | 31-Mar-2021            | Netherlands_Population.txt       | 31-Mar-2021            | NLD.Deaths_1x1.txt                                                                                                                                            | NLD.Population.txt       |
| Norway                                    | NOR | Norway_Deaths_1x1.txt            | 15-Apr-2021            | Norway_Population.txt            | 15-Apr-2021            | NOR.Deaths_1x1.txt                                                                                                                                            | NOR.Population.txt       |
| New Zealand                               | NZL | New_Zealand_Deaths_1x1.txt       | 26-Sep-2017            | New_Zealand_Population.txt       | 26-Sep-2017            | NZL_NP.Deaths_1x1.txt                                                                                                                                         | NZL_NP.Population.txt    |
| Poland                                    | POL | Poland_Deaths_1x1.txt            | 13-Apr-2021            | Poland_Population.txt            | 13-Apr-2021            | POL.Deaths_1x1.txt                                                                                                                                            | POL.Population.txt       |
| Portugal                                  | PRT | Portugal_Deaths_1x1.txt          | 01-Aug-2021            | Portugal_Population.txt          | 01-Aug-2021            | PRT.Deaths_1x1.txt                                                                                                                                            | PRT.Population.txt       |
| Slovakia                                  | SVK | Slovakia_Deaths_1x1.txt          | 29-Oct-2021            | Slovakia_Population.txt          | 29-Oct-2021            | SVK.Deaths_1x1.txt                                                                                                                                            | SVK.Population.txt       |
| Slovenia                                  | SVN | Slovenia_Deaths_1x1.txt          | 01-Nov-2021            | Slovenia_Population.txt          | 01-Nov-2021            | SVN.Deaths_1x1.txt                                                                                                                                            | SVN.Population.txt       |
| Sweden                                    | SWE | Sweden_Deaths_1x1.txt            | 12-May-2022            | Sweden_Population.txt            | 12-May-2022            | SWE.Deaths_1x1.txt                                                                                                                                            | SWE.Population.txt       |
| United States                             | USA | USA_Deaths_1x1.txt               | 17-Mar-2021            | USA_Population.txt               | 17-Mar-2021            | USA.Deaths_1x1.txt                                                                                                                                            | USA.Population.txt       |

All Deaths\_1x1.txt and Population.txt files are downloaded as a zip file [https://www.mortality.org/File/Download/hmd.v6/zip/all\\_hmd/hmd\\_statistics\\_20220812.zip](https://www.mortality.org/File/Download/hmd.v6/zip/all_hmd/hmd_statistics_20220812.zip), where the Version shown here is "hmd\_statistics\_20220812" and changes frequently. The relevant files for Deaths and Population are in directories [<Version>/deaths/Deaths\\_1x1/](https://www.mortality.org/File/Download/hmd.v6/zip/all_hmd/hmd_statistics_20220812.zip/Version/deaths/Deaths_1x1/) and [<Version>/population/Population/](https://www.mortality.org/File/Download/hmd.v6/zip/all_hmd/hmd_statistics_20220812.zip/Version/population/Population/) respectively. More generally, the download button for the latest version is marked "All HMD Statistics" and is at the bottom of the page linked by <https://www.mortality.org/Data/ZippedDataFiles>
